# Supplementary material for: Pyrene and imidazole functionalized luminescent bimetallic Ru(ii) terpyridine complexes as efficient optical chemosensors for cyanide in aqueous, organic and solid media
Source: Royal Society of Chemistry journal article supplement (doi:10.1039/c5dt02585k), 2015-01-01
Supplement: c5dt02585k1.pdf [file c5dt02585k1.pdf]

## Electronic supplementary information

### **Pyrene and imidazole functionalized luminescent bimetallic Ru(II) terpyridine complexes as efficient optical chemosensors for cyanide in aqueous, organic and solid media**

**Srikanta Karmakar, Dinesh Maity, Sourav Mardanya and Sujoy Baitalik\***

#### **Table of Contents:**

|                                                                                                                                                                                                                             |     |
|-----------------------------------------------------------------------------------------------------------------------------------------------------------------------------------------------------------------------------|-----|
| Experimental Section                                                                                                                                                                                                        | S2  |
| Physical Measurements                                                                                                                                                                                                       | S2  |
| Theoretical Calculation Methods.                                                                                                                                                                                            | S3  |
| <b>Table S1</b> Bond Distances (Å) for Complexes 1-3 and 1a-3a in the Ground State in DMSO.                                                                                                                                 | S4  |
| <b>Table S2</b> Bond Angles (deg) for <b>1-3</b> and <b>1a-3a</b> in the Ground States in DMSO.                                                                                                                             | S4  |
| <b>Table S3</b> Bond Distances (Å) for Complexes <b>1a</b> and <b>3a</b> in the UKS optimized State in DMSO.                                                                                                                | S5  |
| <b>Table S4</b> Bond Angles (deg) for <b>1a-3a</b> in the UKS Optimized States in DMSO.                                                                                                                                     | S5  |
| <b>Table S5</b> MOs along with their Energies and Compositions for <b>1a</b> and <b>3a</b> in UKS optimized state.                                                                                                          | S6  |
| <b>Table S6</b> Emission of the Complexes <b>1a</b> and <b>3a</b> in DMSO According to UKS-Calculations and Associated Experimental Values.                                                                                 | S6  |
| <b>Fig. S1</b> The overlay of normalized excitation and absorption spectra of <b>1-3</b> in DMSO, respectively.                                                                                                             | S7  |
| <b>Fig. S2</b> Color changes that observed when the DMSO solutions of <b>1</b> (i), <b>2</b> (ii) and <b>3</b> (iii) are treated with different anions.                                                                     | S8  |
| <b>Fig. S3</b> Changes in UV-vis absorption, steady state emission and excited state decay of <b>1</b> on incremental addition of F <sup>-</sup> in DMSO.                                                                   | S9  |
| <b>Fig. S4</b> Changes in UV-vis absorption and steady state luminescence of <b>1</b> on incremental addition of AcO <sup>-</sup> , CN <sup>-</sup> and H <sub>2</sub> PO <sub>4</sub> <sup>-</sup> , respectively in DMSO. | S10 |
| <b>Fig. S5</b> Changes in UV-vis absorption, steady state emission and excited state decay of <b>2</b> on incremental addition of F <sup>-</sup> in DMSO.                                                                   | S11 |

|                                                                                                                                                                                                    |         |
|----------------------------------------------------------------------------------------------------------------------------------------------------------------------------------------------------|---------|
| <b>Fig. S6</b> Changes in UV-vis absorption and steady state luminescence <b>2</b> on incremental addition of $\text{AcO}^-$ , $\text{CN}^-$ and $\text{H}_2\text{PO}_4^-$ , respectively in DMSO. | S12     |
| <b>Fig. S7</b> Changes in UV-vis absorption and steady state luminescence spectrum of <b>3</b> on incremental addition of $\text{AcO}^-$ in DMSO.                                                  | S13     |
| <b>Fig. S8</b> Changes in UV-vis absorption and steady state luminescence of <b>3</b> on incremental addition of $\text{CN}^-$ in DMSO.                                                            | S14     |
| <b>Fig. S9</b> Changes in UV-vis absorption and steady state luminescence spectrum of <b>3</b> on incremental addition of $\text{H}_2\text{PO}_4^-$ in DMSO.                                       | S15     |
| <b>Fig. S10</b> The overlay of normalized excitation spectra of <b>3</b> before and after addition of $\text{CN}^-$ in DMSO, respectively.                                                         | S16     |
| <b>Fig. S11</b> The calculated detection limit for $\text{F}^-$ of <b>1</b> in DMSO.                                                                                                               | S17     |
| <b>Fig. S12</b> The calculated detection limit for $\text{CN}^-$ of <b>1</b> in DMSO.                                                                                                              | S17     |
| <b>Fig. S13</b> The calculated detection limit for $\text{F}^-$ of <b>2</b> in DMSO.                                                                                                               | S18     |
| <b>Fig. S14</b> The calculated detection limit for $\text{CN}^-$ of <b>2</b> in DMSO.                                                                                                              | S18     |
| <b>Fig. S15</b> The calculated detection limit for $\text{F}^-$ of <b>3</b> in DMSO.                                                                                                               | S19     |
| <b>Fig. S16</b> The calculated detection limit for $\text{CN}^-$ of <b>3</b> in DMSO.                                                                                                              | S19     |
| <b>Fig. S17</b> Changes in UV-vis absorption and luminescence spectrum of <b>1</b> and <b>2</b> , respectively on incremental addition of $\text{CN}^-$ in DMSO- $\text{H}_2\text{O}$ (1:100).     | S20     |
| <b>Fig. 18</b> Changes of time-resolved luminescence spectra of <b>1</b> and <b>2</b> , in DMSO- $\text{H}_2\text{O}$ (1:100) upon addition of $\text{CN}^-$ .                                     | S21     |
| <b>Fig. S19-21</b> The calculated detection limit for $\text{CN}^-$ of <b>1-3</b> in DMSO- $\text{H}_2\text{O}$ (1:100)                                                                            | S22-S23 |
| <b>Fig. S22-24</b> Changes in UV-vis absorption and steady state luminescence spectrum of <b>1-3</b> upon incremental addition of $\text{OH}^-$ in DMSO.                                           | S24-S26 |
| <b>Fig. S25</b> Optimized geometries <b>1a-3a</b> in ground state in DMSO.                                                                                                                         | S27     |
| <b>Fig. S26-S28</b> NTOs illustrating the nature of optically active singlet excited states in absorption bands for <b>1a-3a</b> .                                                                 | S28-S29 |
| <b>Fig. S29</b> UKS Optimized geometries of <b>1a</b> and <b>3a</b> , in DMSO.                                                                                                                     | S30     |
| <b>Fig. S30</b> Selective frontier molecular orbitals for <b>1a</b> (a) and <b>3a</b> (b) in UKS optimized state in DMSO.                                                                          | S31     |
| <b>References</b>                                                                                                                                                                                  | S32     |

## Experimental Section

**Physical Measurements.** NMR spectra of the complexes were recorded on a Bruker 300 spectrometer in  $\text{DMSO}-d_6$ . UV-vis absorption spectra were recorded using a Shimadzu UV 1800 spectrometer at room temperature. Steady state luminescence spectra were obtained either by Perkin-Elmer LS55 spectrofluorometer. Luminescence quantum yields were determined using literature method taking  $[\text{Ru}(\text{bpy})_3]^{2+}$  for metal complexes and quinine sulphate for ligand as the

standard. Luminescence lifetime measurements were carried out by using time-correlated single photon counting set up from Horiba Jobin-Yvon. The luminescence decay data were collected on a Hamamatsu MCP photomultiplier (R3809) and were analyzed by using IBH DAS6 software.

The sensing studies of the complexes (**1-3**) with different anions were carried out in DMSO (~10.0  $\mu\text{M}$ ) as well as in DMSO-water medium (1:100) (~10.0  $\mu\text{M}$ ). Tetrabutylammonium (TBA) salts of different anions were used for titration experiments. On the other hand, for a typical absorption and emission titration experiment, 1  $\mu\text{L}$  aliquot of a given anion (10 mM) was added successively to a 2.5 mL solution of the metal complexes (~10.0  $\mu\text{M}$ ). The binding/equilibrium constant towards anion were evaluated from the absorbance data using equation (1).

$$A_{\text{obs}} = (A_0 + A_{\infty}K[\text{G}]_{\text{T}})/(1 + K[\text{G}]_{\text{T}}) \quad (1)$$

where  $A_{\text{obs}}$  is the observed absorbance,  $A_0$  is the absorbance of the free receptor,  $A_{\infty}$  is the maximum absorbance induced by the presence of a given anionic guest,  $[\text{G}]_{\text{T}}$  is the total concentration of the guest, and  $K$  is the binding/equilibrium constant of the host-guest entity. Binding constants were performed in duplicate, and the average value is reported.

Experimental uncertainties were as follows: absorption maxima,  $\pm 2$  nm; molar absorption coefficients, 10%; emission maxima,  $\pm 5$  nm; excited-state lifetimes, 10%; luminescence quantum yields, 20%.

**Theoretical Calculation Methods.** Quantum chemical calculations were performed with the Gaussian 09 program.<sup>S1</sup> The geometries of the ground-state ( $S_0$ ) were optimized by means of density functional theory using the exchange-correlation functional B3LYP.<sup>S2,S3</sup> The 6-31G(d) basis set was employed for the C, H and N while SDD basis set was used for Ru atom. The singlet excited state geometries corresponding to the vertical excitations were optimized using the time-dependent DFT (TDDFT) scheme to compute the UV-vis transitions of the compounds, starting with the ground state geometries optimized in solution phase.<sup>S4-S7</sup> The effects of the interaction with solvent DMSO ( $\epsilon = 46.826$ ) on the geometries and excitation energies were taken into account by the integral equation formalism of the conductor-like polarizable continuum model (CPCM).<sup>S8</sup> UKS calculations were also performed directly on the triplet state of the complexes to calculate singlet-triplet energy gap. Orbital analysis was completed with Gauss View<sup>S9</sup> and Gauss sum 2.2<sup>S10</sup>.

**Table S1** Selected calculated bond distances (Å) for complexes **1-3** and **1a-3a** in the ground state in DMSO.

|          | sol      |          |          |           |           |           |
|----------|----------|----------|----------|-----------|-----------|-----------|
|          | <b>1</b> | <b>2</b> | <b>3</b> | <b>1a</b> | <b>2a</b> | <b>3a</b> |
| Ru1-N6   | 2.109    | 2.111    | 2.122    | 2.109     | 2.111     | 2.117     |
| Ru1-N2   | 2.007    | 2.006    | 2.000    | 2.009     | 2.009     | 1.985     |
| Ru1-N4   | 2.109    | 2.111    | 2.120    | 2.109     | 2.110     | 2.118     |
| Ru1-N5   | 2.010    | 2.008    | 2.042    | 2.008     | 2.006     | 2.059     |
| Ru1-N1   | 2.111    | 2.111    | 2.109    | 2.111     | 2.112     | 2.098     |
| Ru1-N3   | 2.111    | 2.111    | 2.108    | 2.112     | 2.110     | 2.097     |
| Ru2-N'4  | 2.109    | 2.111    | 2.122    | 2.109     | 2.110     | 2.118     |
| Ru2- N'5 | 2.010    | 2.006    | 2.000    | 2.008     | 2.006     | 2.059     |
| Ru2- N'6 | 2.110    | 2.111    | 2.108    | 2.109     | 2.111     | 2.117     |
| Ru2- N'1 | 2.111    | 2.111    | 2.042    | 2.111     | 2.112     | 2.098     |
| Ru2- N'2 | 2.007    | 2.111    | 2.109    | 2.009     | 2.009     | 1.985     |
| Ru2- N'3 | 2.111    | 2.008    | 2.120    | 2.112     | 2.110     | 2.097     |

**Table S2** Selected calculated bond angles (deg) for **1-3** and **1a-3a** in the ground optimized states in DMSO.

|           | <b>1</b> | <b>2</b> | <b>3</b> | <b>1a</b> | <b>2a</b> | <b>3a</b> |
|-----------|----------|----------|----------|-----------|-----------|-----------|
| N6Ru1N2   | 101.9    | 102.1    | 102.3    | 101.8     | 101.9     | 102.3     |
| N6Ru1N4   | 157.0    | 156.7    | 154.9    | 157.1     | 156.8     | 154.5     |
| N6Ru1N5   | 78.5     | 78.3     | 77.4     | 78.5      | 78.3      | 77.3      |
| N6Ru1N1   | 92.2     | 92.2     | 92.7     | 92.2      | 92.1      | 92.5      |
| N2Ru1N3   | 78.4     | 78.4     | 78.5     | 78.2      | 78.3      | 78.8      |
| N2Ru1N4   | 100.9    | 101.0    | 102.3    | 101.0     | 101.2     | 103.0     |
| N2Ru1N1   | 78.3     | 78.4     | 78.5     | 78.3      | 78.2      | 78.7      |
| N3Ru1N6   | 92.1     | 92.2     | 92.1     | 92.3      | 92.4      | 92.5      |
| N4Ru1N5   | 78.5     | 78.3     | 77.4     | 78.5      | 78.4      | 77.2      |
| N4Ru1N1   | 92.2     | 92.3     | 92.2     | 92.2      | 92.3      | 92.3      |
| N4Ru1N3   | 92.4     | 92.4     | 92.4     | 92.3      | 92.3      | 92.4      |
| N5Ru1N1   | 101.7    | 101.7    | 101.5    | 101.8     | 102.0     | 101.4     |
| N5Ru1N3   | 101.4    | 101.4    | 101.3    | 101.5     | 101.3     | 101.0     |
| N1Ru1N3   | 156.8    | 156.8    | 157.0    | 156.6     | 156.6     | 157.5     |
| N'2Ru2N'3 | 78.4     | 78.4     | 78.5     | 78.2      | 78.3      | 78.8      |
| N'2Ru2N'1 | 78.3     | 78.4     | 78.5     | 78.3      | 78.2      | 78.7      |
| N'2Ru2N'4 | 101.3    | 101.0    | 102.6    | 100.9     | 101.2     | 103.0     |
| N'2Ru2N'6 | 101.5    | 101.0    | 102.3    | 101.8     | 101.9     | 102.3     |
| N'3Ru2N'1 | 156.8    | 156.8    | 157.0    | 156.6     | 156.6     | 157.5     |
| N'3Ru2N'4 | 92.5     | 92.2     | 92.4     | 92.3      | 92.3      | 92.4      |
| N'3Ru2N'5 | 101.7    | 101.4    | 101.3    | 101.5     | 101.3     | 101.0     |
| N'3Ru2N'6 | 92.1     | 92.2     | 92.4     | 92.3      | 92.4      | 92.5      |
| N'1Ru2N'4 | 92.2     | 92.2     | 92.1     | 92.2      | 92.3      | 92.3      |
| N'1Ru2N'5 | 101.4    | 101.7    | 101.3    | 101.8     | 102.0     | 101.4     |
| N'1Ru2N'6 | 92.1     | 92.3     | 92.7     | 92.2      | 92.1      | 92.5      |
| N'4Ru2N'5 | 78.5     | 78.3     | 77.4     | 78.5      | 78.4      | 77.2      |
| N'4Ru2N'6 | 157.0    | 156.7    | 154.9    | 157.1     | 156.8     | 154.5     |
| N'5Ru2N'6 | 78.5     | 78.3     | 77.4     | 78.5      | 78.3      | 77.3      |

**Table S3** Selected calculated bond distances (Å) for complexes **1a** and **3a** in the UKS optimized state in DMSO.

|          | UKS optimized state |           |
|----------|---------------------|-----------|
|          | <b>1a</b>           | <b>3a</b> |
| Ru1-N6   | 2.107               | 2.121     |
| Ru1-N2   | 2.012               | 1.992     |
| Ru1-N4   | 2.107               | 2.122     |
| Ru1-N5   | 2.003               | 2.053     |
| Ru1-N1   | 2.110               | 2.099     |
| Ru1-N3   | 2.110               | 2.098     |
| Ru2-N'2  | 2.012               | 1.992     |
| Ru2- N'3 | 2.110               | 2.098     |
| Ru2- N'1 | 2.110               | 2.099     |
| Ru2- N'4 | 2.107               | 2.122     |
| Ru2- N'5 | 2.003               | 2.053     |
| Ru2- N'6 | 2.107               | 2.121     |

**Table S4** Selected calculated bond angles (deg) for **1a-3a** in the UKS optimized states in DMSO.

| UKS optimized state |           |           |
|---------------------|-----------|-----------|
|                     | <b>1a</b> | <b>3a</b> |
| N6Ru1N2             | 101.6     | 102.2     |
| N6Ru1N4             | 157.3     | 154.8     |
| N6Ru1N5             | 78.6      | 77.4      |
| N6Ru1N1             | 92.1      | 92.4      |
| N6Ru1N3             | 92.4      | 92.6      |
| N2Ru1N4             | 100.9     | 102.9     |
| N2Ru1N3             | 78.1      | 78.6      |
| N4Ru1N5             | 78.7      | 77.3      |
| N4Ru1N1             | 92.2      | 92.4      |
| N4Ru1N3             | 92.3      | 92.4      |
| N5Ru1N1             | 102.0     | 101.6     |
| N5Ru1N3             | 101.6     | 101.1     |
| N1Ru1N3             | 156.3     | 157.1     |
| N5Ru1N2             | 179.6     | 179.5     |
| N'2Ru2N'3           | 78.1      | 78.6      |
| N'2Ru2N'1           | 78.1      | 78.5      |
| N'2Ru2N'4           | 100.9     | 102.9     |
| N'2Ru2N'5           | 179.6     | 179.5     |
| N'2Ru2N'6           | 101.6     | 102.2     |
| N'5Ru2N'1           | 102.0     | 101.6     |
| N'3Ru2N'4           | 92.3      | 92.4      |
| N'3Ru2N'5           | 101.6     | 101.1     |
| N'3Ru2N'6           | 92.4      | 92.6      |
| N'1Ru2N'4           | 92.2      | 92.4      |
| N'1Ru2N'5           | 102.0     | 101.6     |
| N'1Ru2N'6           | 92.1      | 92.4      |
| N'4Ru2N'5           | 78.7      | 77.3      |
| N'4Ru2N'6           | 157.3     | 154.8     |
| N'5Ru2N'6           | 78.6      | 77.4      |
| N'1Ru2N'3           | 156.3     | 157.1     |

**Table S5** Selected MOs along with their energies and compositions for **1a** and **3a** in UKS optimized state.

| MO        | Energy,<br>eV    | (%) Composition  |       |        |                 |       |
|-----------|------------------|------------------|-------|--------|-----------------|-------|
|           | Sol <sup>n</sup> | sol <sup>n</sup> |       |        |                 |       |
| <b>1a</b> |                  | tpycap           | ph    | ligtpy | Pyrene<br>imida | Ru    |
| L+3       | -2.38            | 58.37            | 0.26  | 38.12  | 0.00            | 3.23  |
| L+2       | -2.47            | 40.07            | 0.37  | 59.48  | 0.00            | 0.05  |
| L+1       | -2.59            | 89.92            | 0.02  | 1.90   | 0.00            | 8.14  |
| L         | -2.68            | 1.81             | 6.00  | 82.39  | 2.03            | 7.74  |
| H         | -3.04            | 1.62             | 6.56  | 82.52  | 2.11            | 7.16  |
| H-1       | -4.95            | 0.26             | 14.55 | 2.98   | 80.03           | 2.16  |
| H-2       | -5.29            | 1.07             | 24.80 | 6.34   | 58.37           | 9.40  |
| H-3       | -5.55            | 0.02             | 0.02  | 0.03   | 98.01           | 1.09  |
| <b>3a</b> |                  | py26             | ph    | ligtpy | pyrenei<br>mida | Ru    |
| L+3       | -1.46            | 93.35            | 0.00  | 0.99   | 0.00            | 5.65  |
| L+2       | -1.58            | 0.38             | 0.76  | 95.90  | 0.01            | 2.94  |
| L+1       | -2.08            | 0.15             | 0.69  | 96.93  | 0.00            | 2.22  |
| L         | -2.25            | 1.93             | 6.77  | 77.79  | 2.27            | 11.21 |
| H         | -2.65            | 1.70             | 7.73  | 78.46  | 2.47            | 9.63  |
| H-1       | -4.40            | 33.31            | 0.01  | 11.23  | 0.00            | 55.42 |
| H-2       | -4.75            | 1.60             | 14.21 | 5.51   | 64.41           | 14.25 |
| H-3       | -4.79            | 2.52             | 0.00  | 7.72   | 80.10           | 10.73 |

**Table S6** Phosphorescence emission of the complexes **1a** and **3a** in DMSO according to UKS-calculations and associated experimental values.

|           | Energy for singlet<br>state ( $E1$ /Hartree) | Energy for triplet<br>state ( $E2$ /Hartree) | Emission energy<br>$\Delta E=(E2- E1)/$<br>(eV) | $\lambda_{\text{emission}}$<br>(theo)/nm | $\lambda_{\text{emission}}$<br>(expt)/nm |
|-----------|----------------------------------------------|----------------------------------------------|-------------------------------------------------|------------------------------------------|------------------------------------------|
| <b>1a</b> | -4529.3021                                   | -4529.2585                                   | 1.18                                            | 1045                                     | ----                                     |
| <b>3a</b> | -5053.7670                                   | -5053.7090                                   | 1.57                                            | 785                                      | 820                                      |

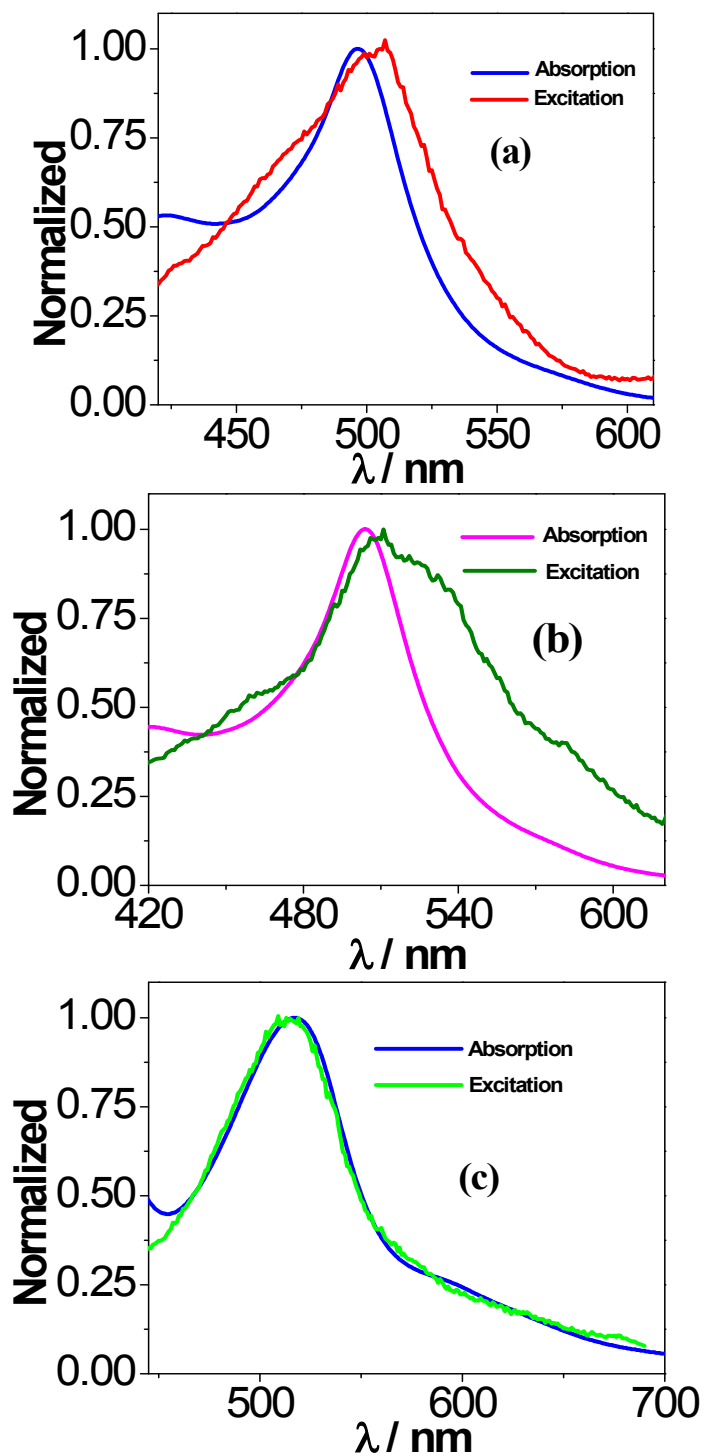

**Fig. S1** Overlay of the normalized luminescence excitation and absorption spectrum of **1** (a), **2** (b), and **3** (c) in DMSO. The monitoring emission wavelength is 664 nm for **1**, 670 nm for **2**, and 703 nm for **3**.

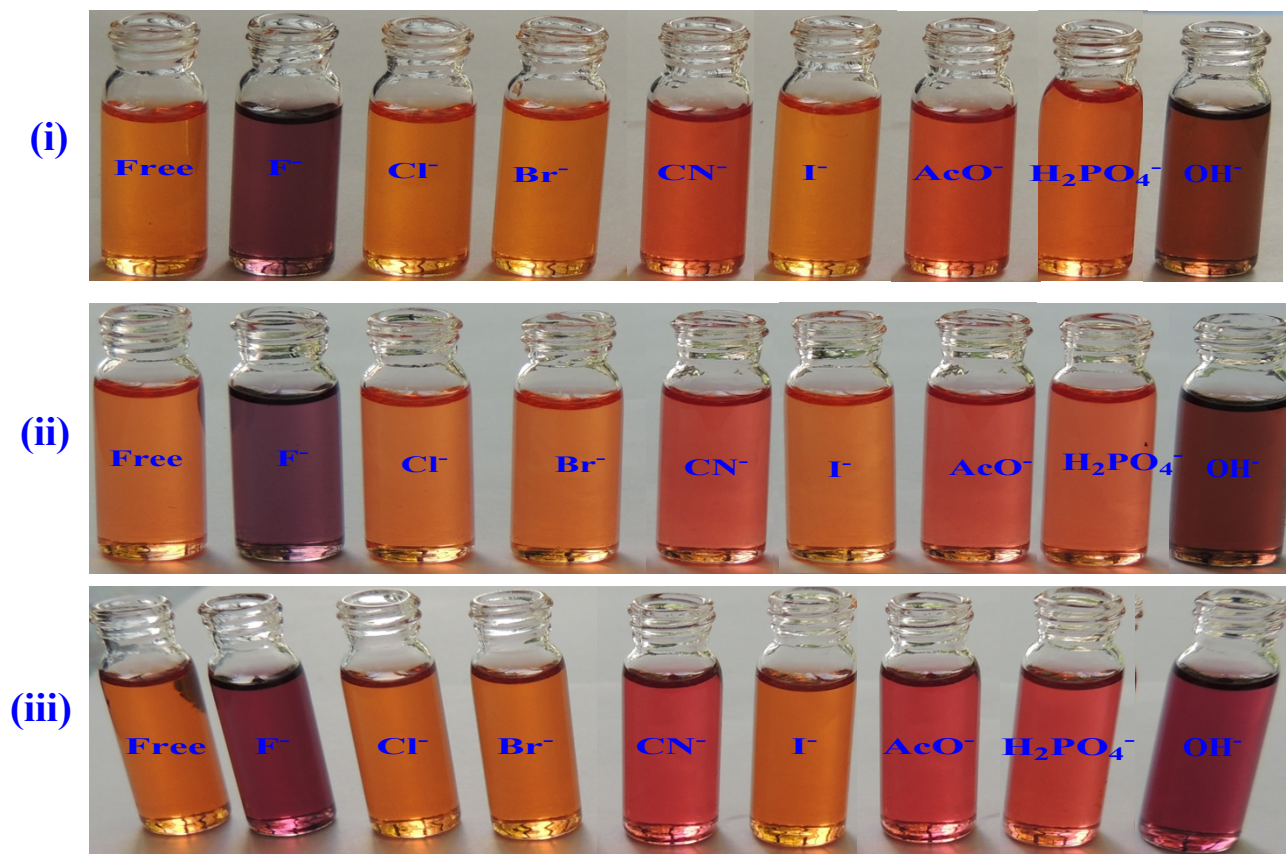

**Fig. S2** Color changes that observed when the DMSO solutions of **1** (i), **2** (ii) and **3** (iii) are treated with different anions as their tetrabutylammonium (TBA) salts.



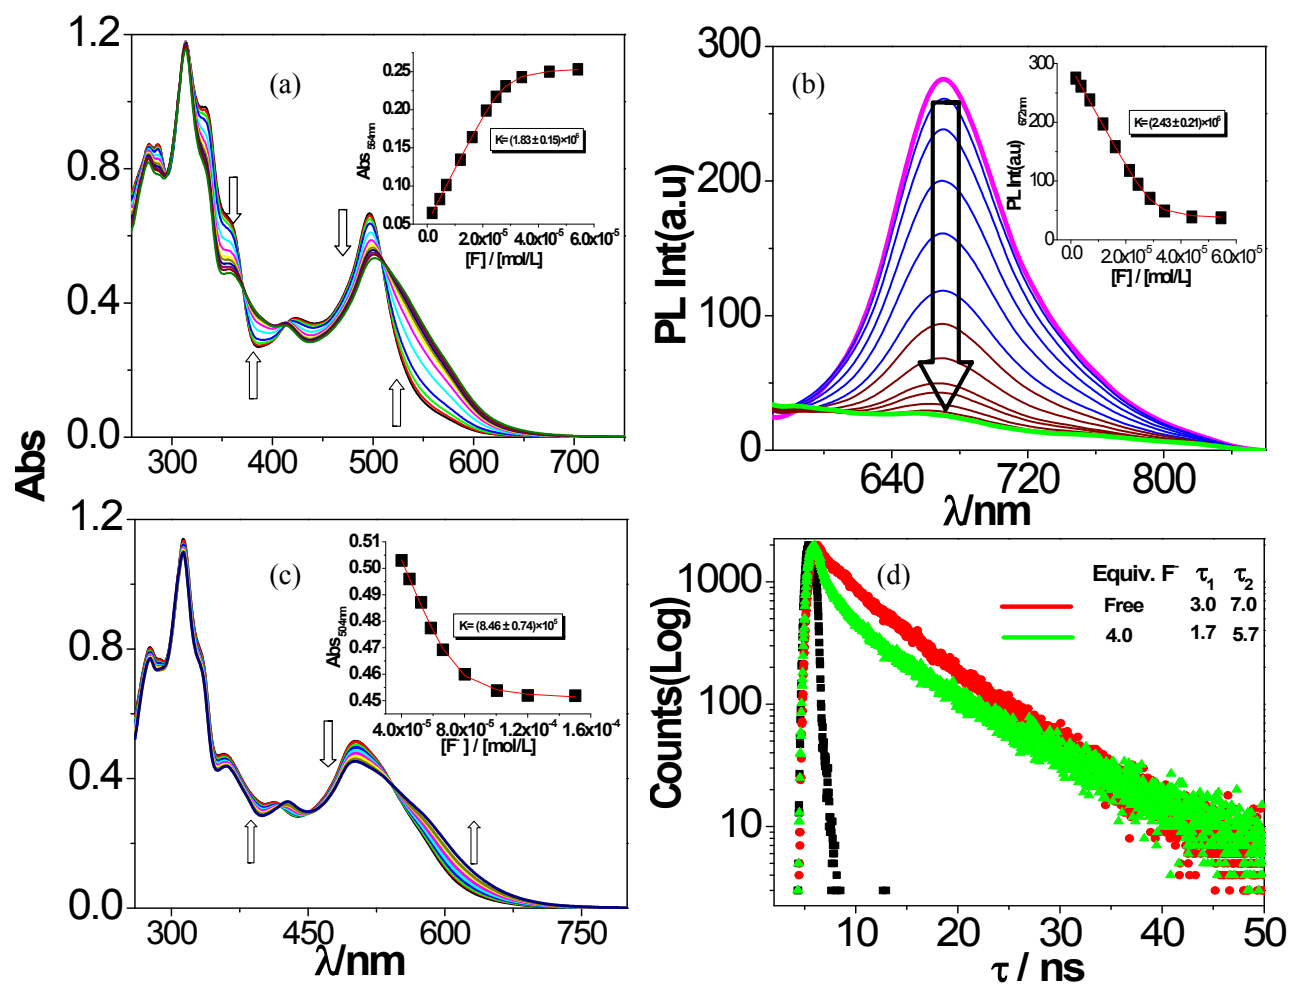

**Fig. S3** Changes in UV-vis absorption (a and c), steady state emission (b) spectrum and excited state decay profiles (d) of **1** on incremental addition of  $F^-$  in DMSO.

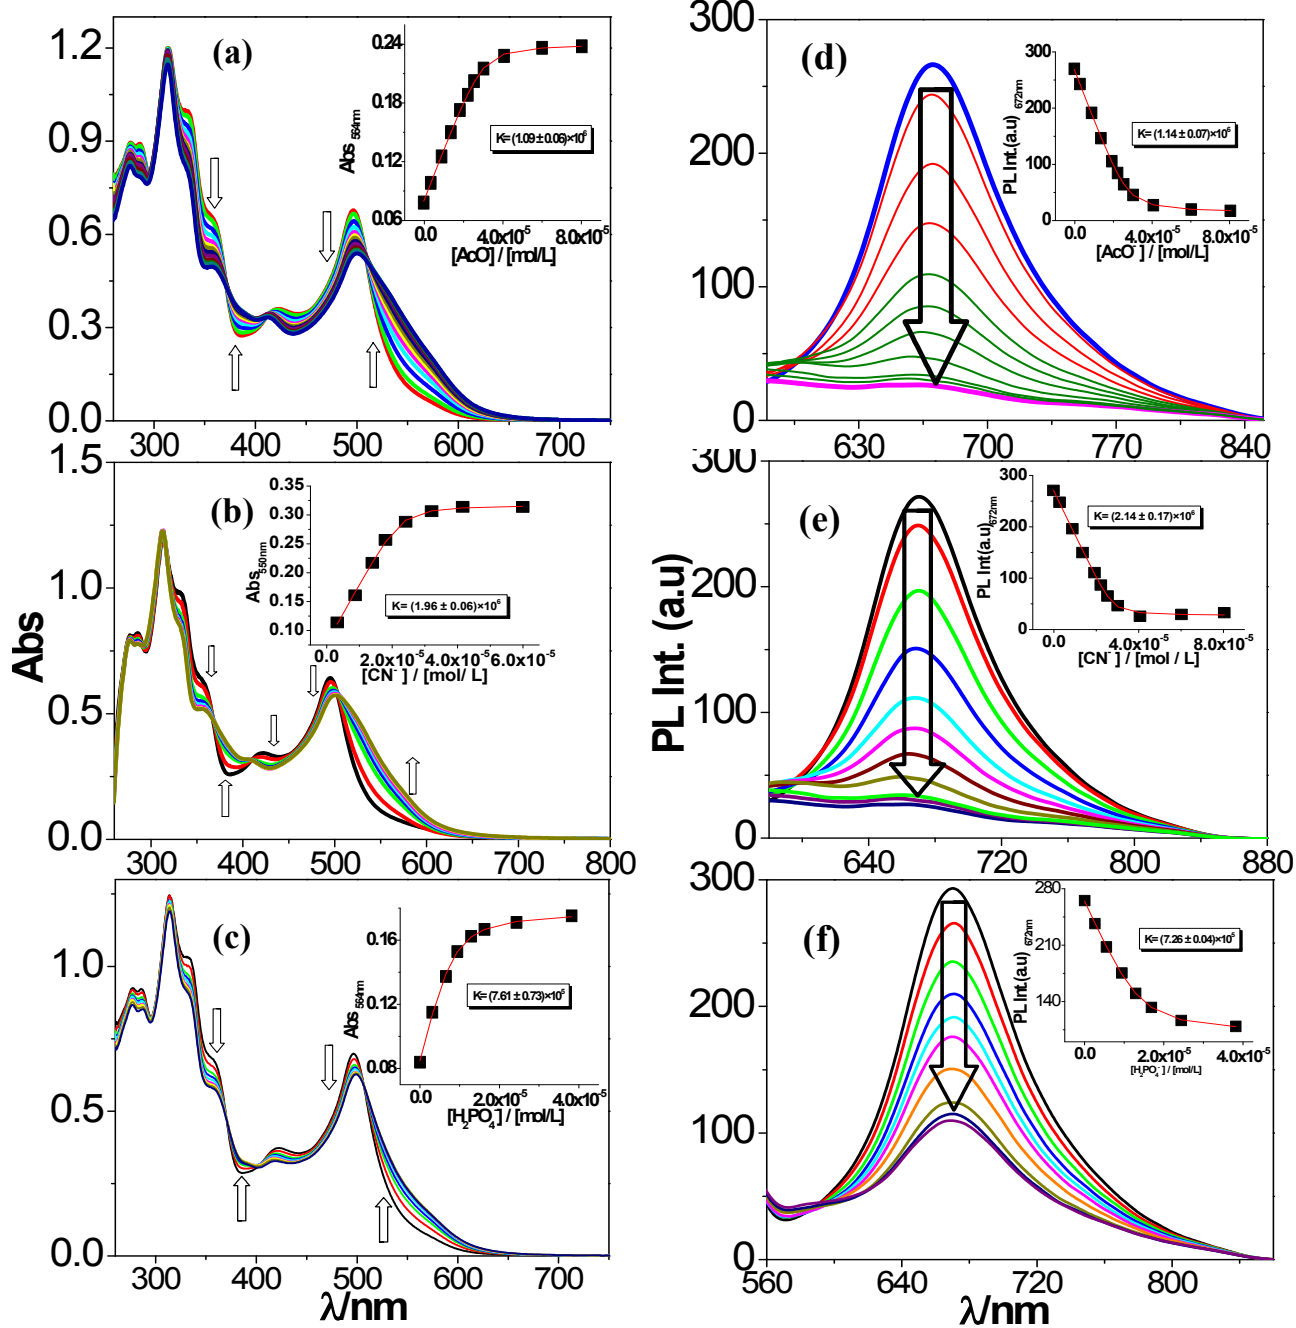

**Fig. S4** Changes in UV-vis absorption (a-c) and steady state luminescence (d-f) spectrum of **1** on incremental addition of  $\text{AcO}^-$ ,  $\text{CN}^-$  and  $\text{H}_2\text{PO}_4^-$ , respectively in DMSO.

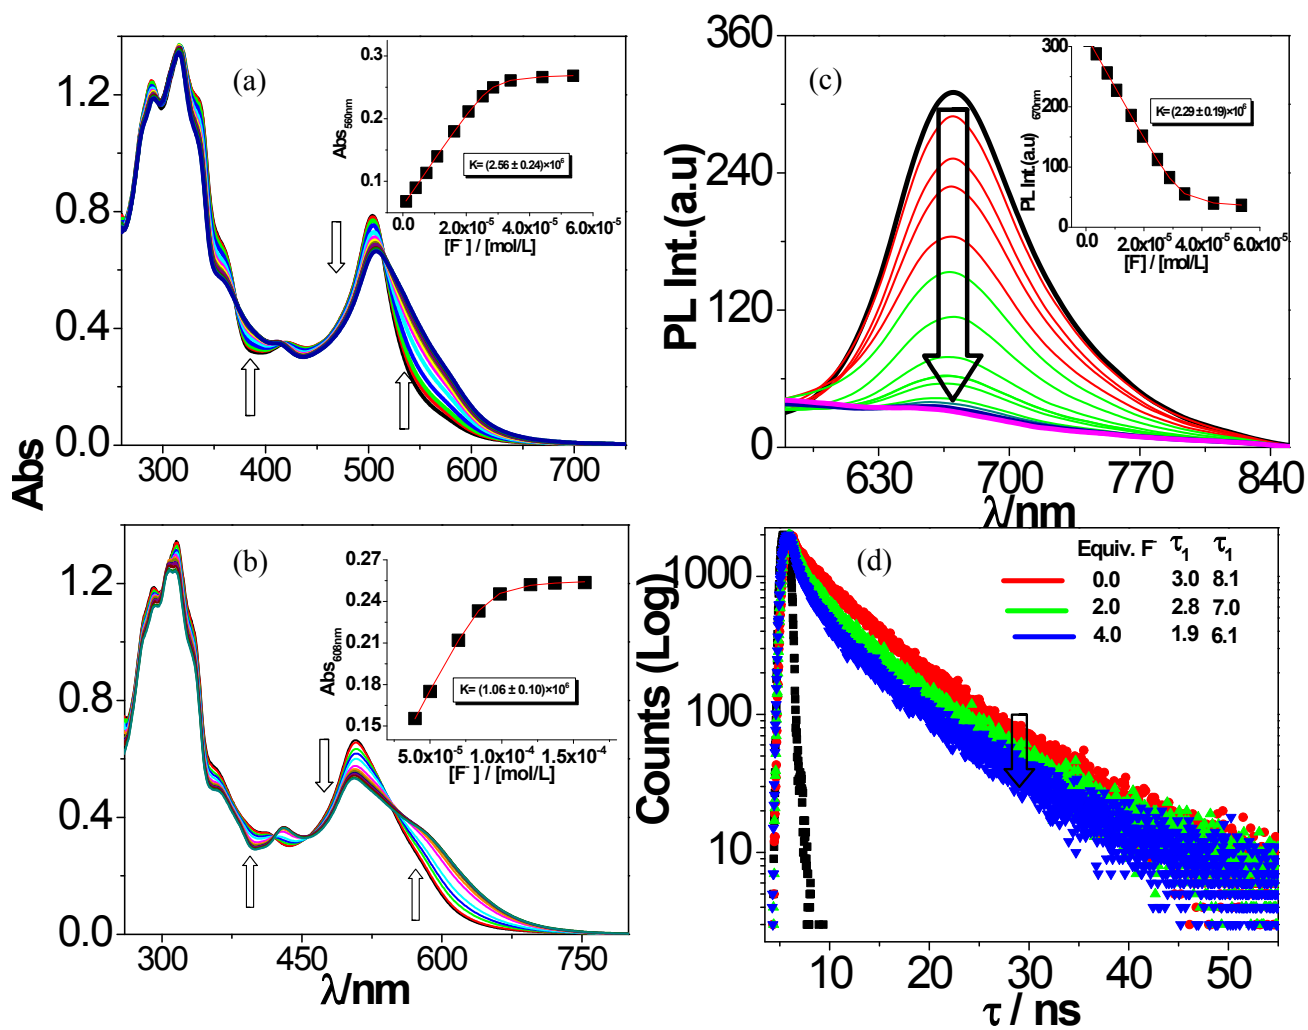

**Fig. S5** Changes in UV-vis absorption (a-b), steady state emission (c) spectrum and excited state decay profiles (d) of 2 on incremental addition of  $F^-$  in DMSO.

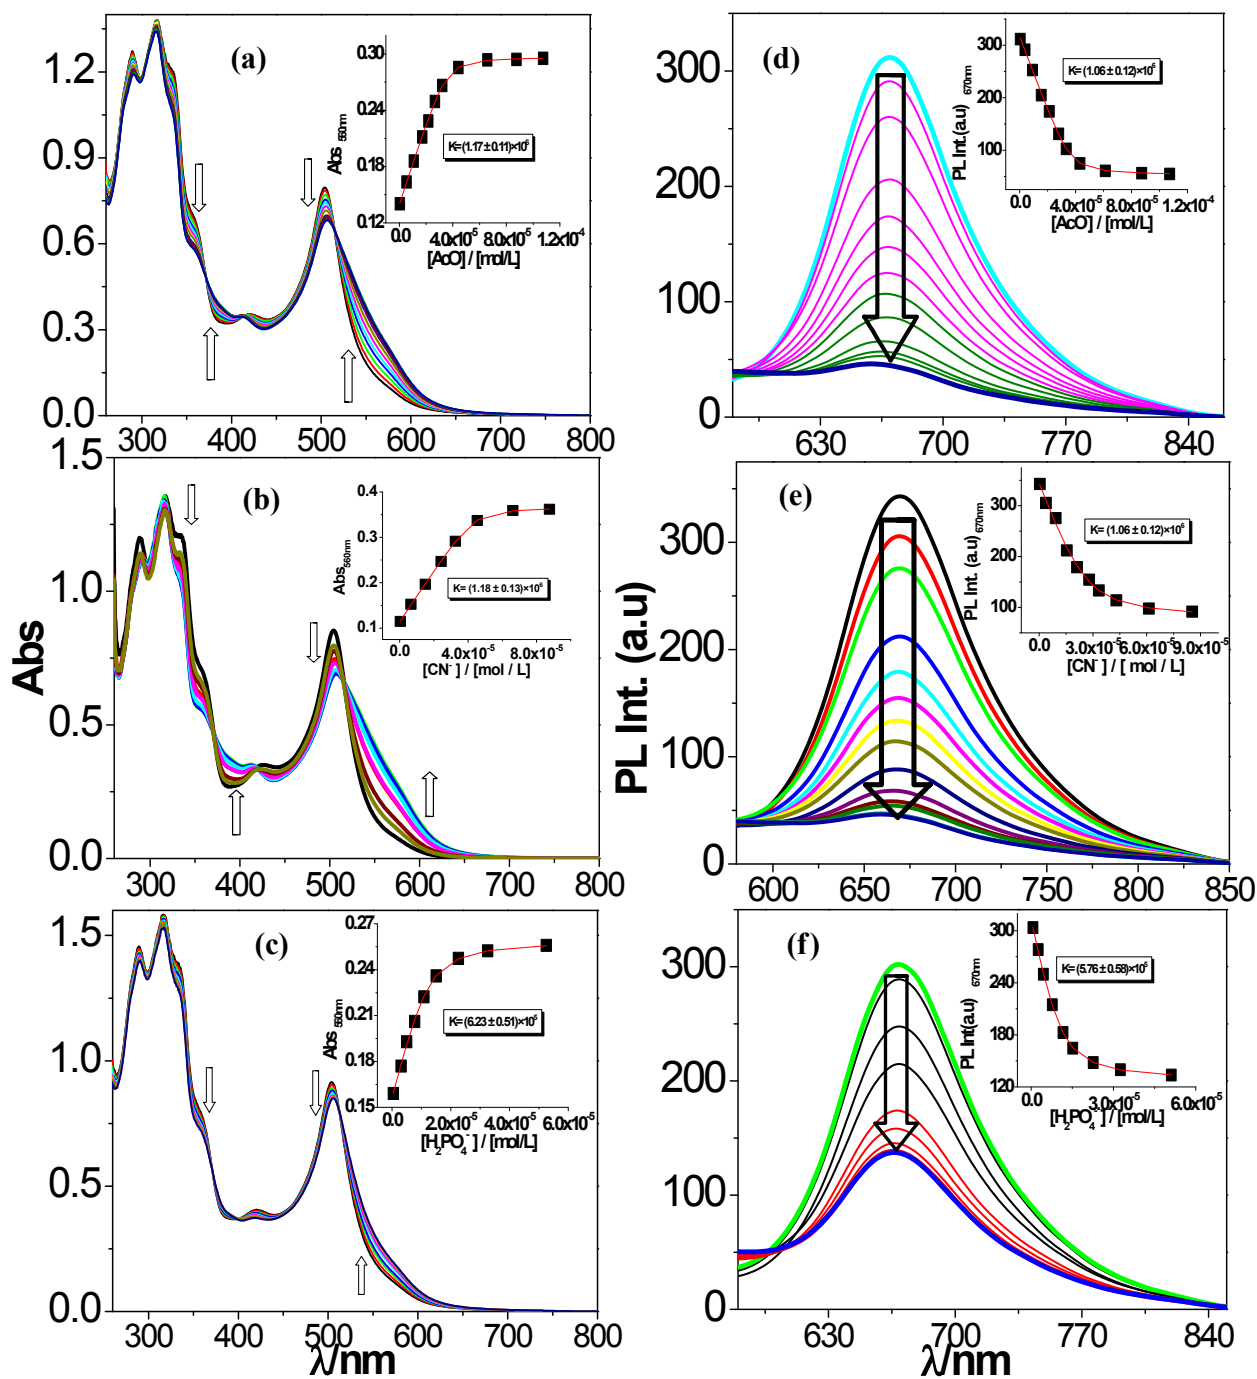

**Fig. S6** Changes in UV-vis absorption (a-c) and steady state luminescence (d-f) spectrum of 2 on incremental addition of  $\text{AcO}^-$ ,  $\text{CN}^-$  and  $\text{H}_2\text{PO}_4^-$ , respectively in DMSO.

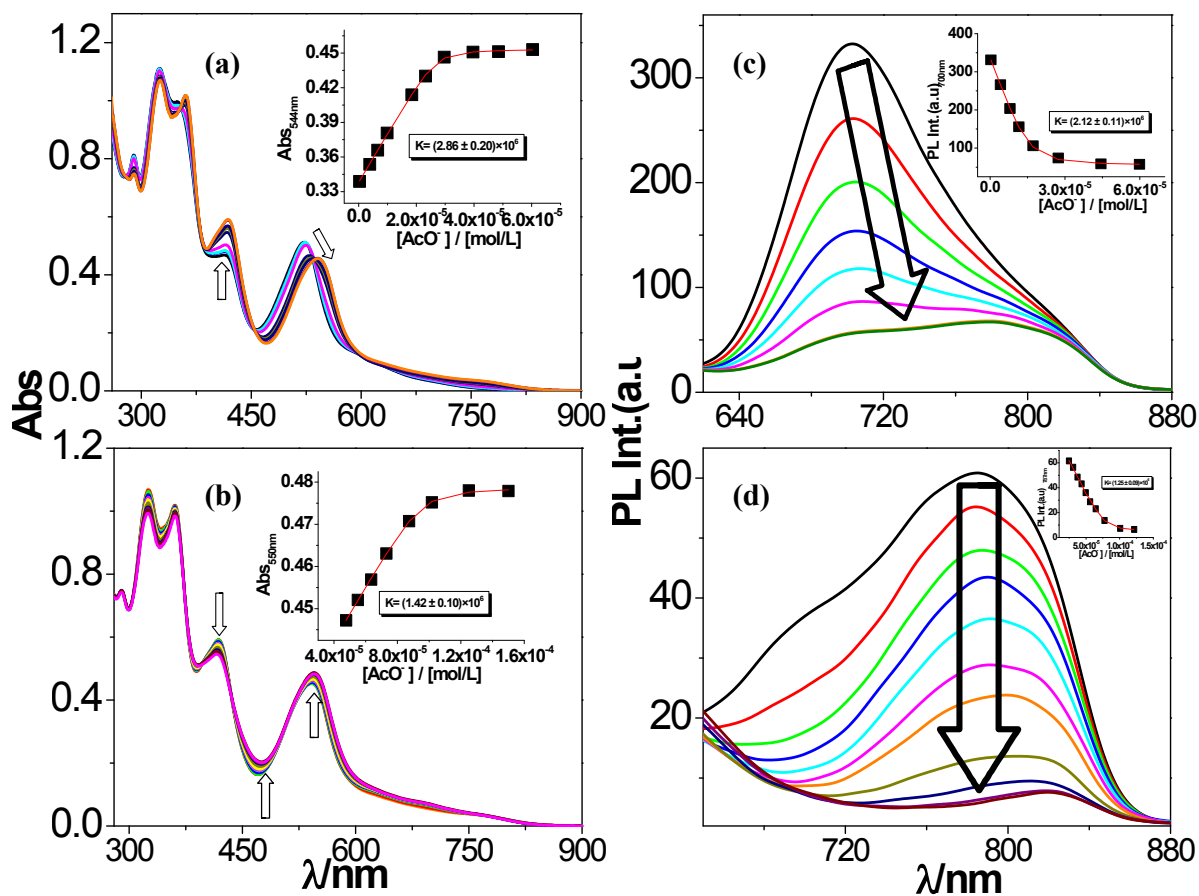

**Fig. S7** Changes in UV-vis absorption (a-b) and steady state luminescence (c-d) spectrum of **3** on incremental addition of AcO<sup>-</sup> in DMSO.

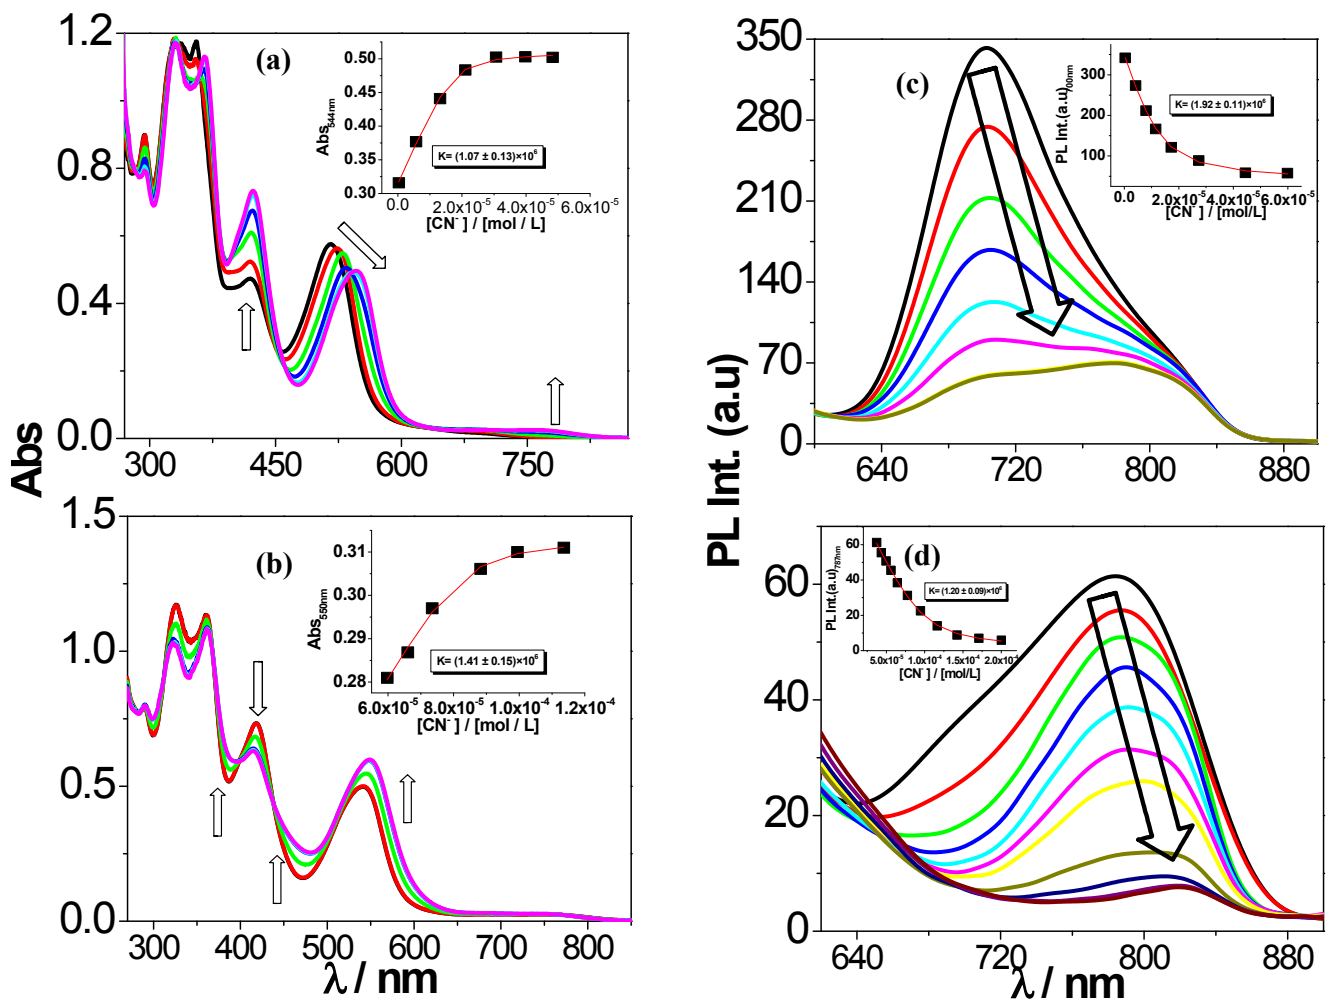

**Fig. S8** Changes in UV-vis absorption (a-b) and steady state luminescence (c-d) spectrum of **3** on incremental addition of  $\text{CN}^-$  in DMSO.

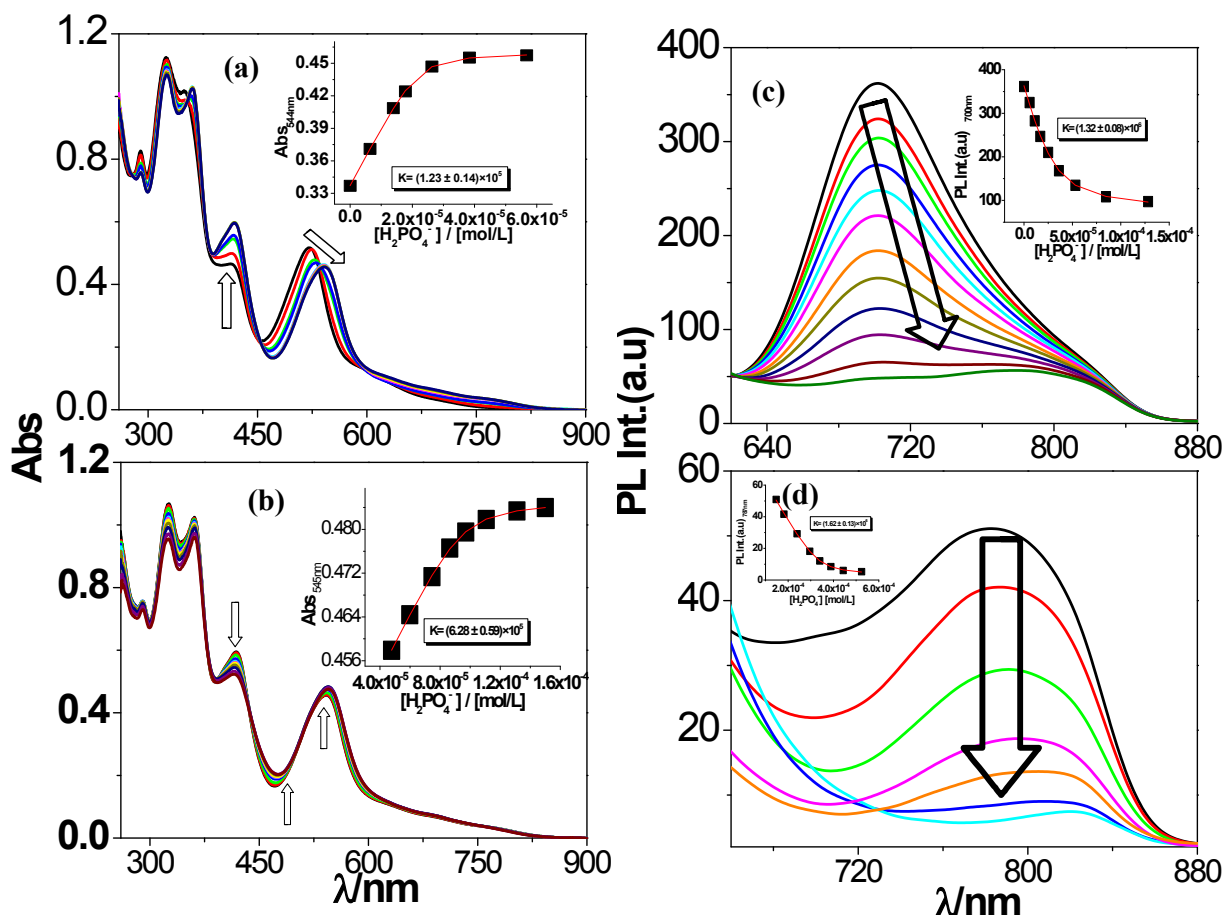

**Fig. S9** Changes in UV-vis absorption (a-b) and steady state luminescence (c-d) spectrum of **3** on incremental addition of  $\text{H}_2\text{PO}_4^-$  in DMSO.

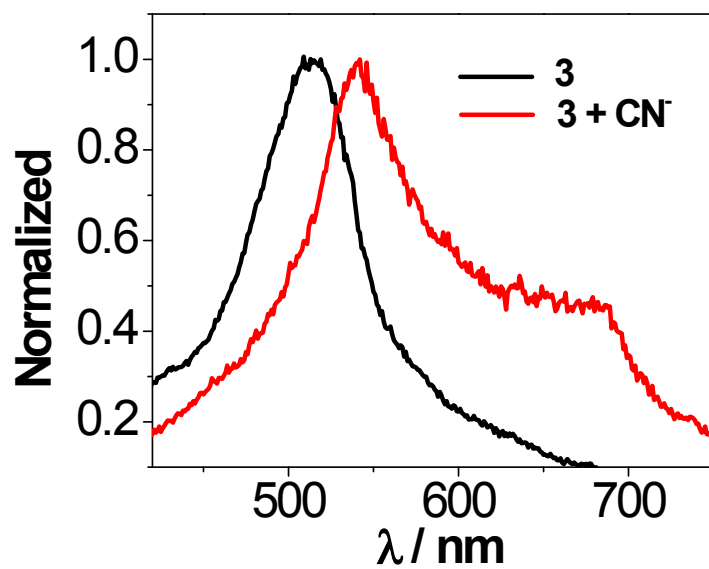

**Fig. S10** Normalized luminescence excitation spectrum of **3** before and after the addition of  $\text{CN}^-$  ion in DMSO. The monitoring emission wavelength is 703 nm and 820 nm, respectively.



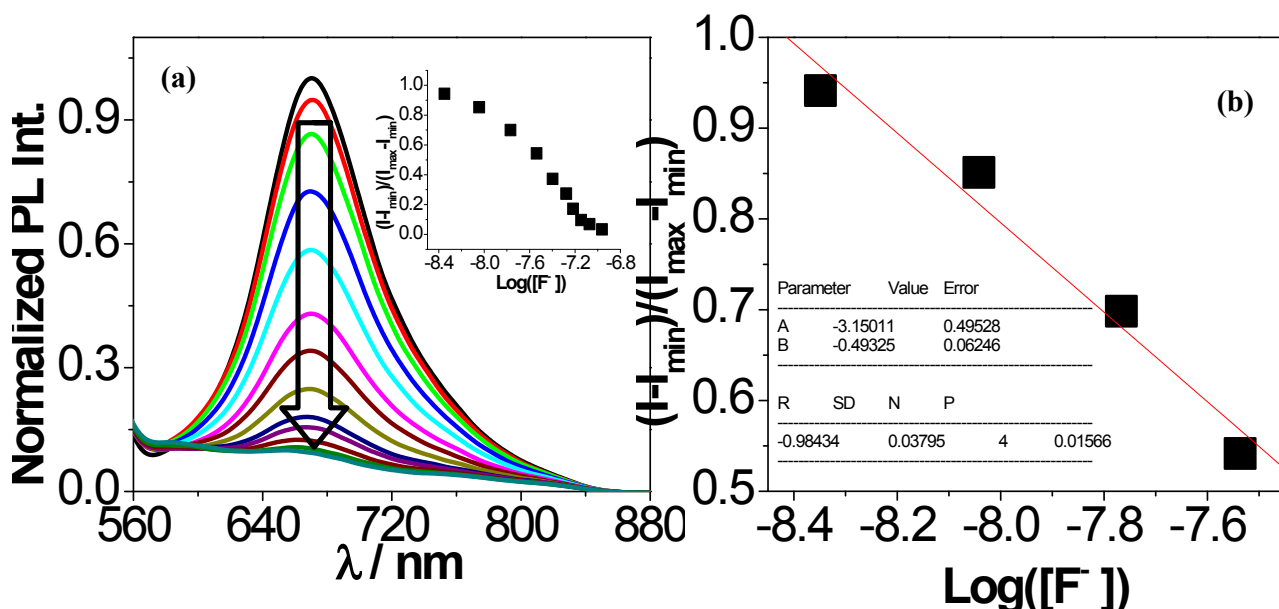

**Fig. S11.** (a) **Photoluminescence** changes during the titration of the receptor 1 in DMSO solution, inset: Normalized intensity between the minimum intensity and the maximum intensity. (b) A plot of  $(I-I_{\min})/(I_{\max}-I_{\min})$  vs  $\text{Log}([F^-])$ , the calculated detection limit of receptor is  $3.89 \times 10^{-9}\text{M}$ .

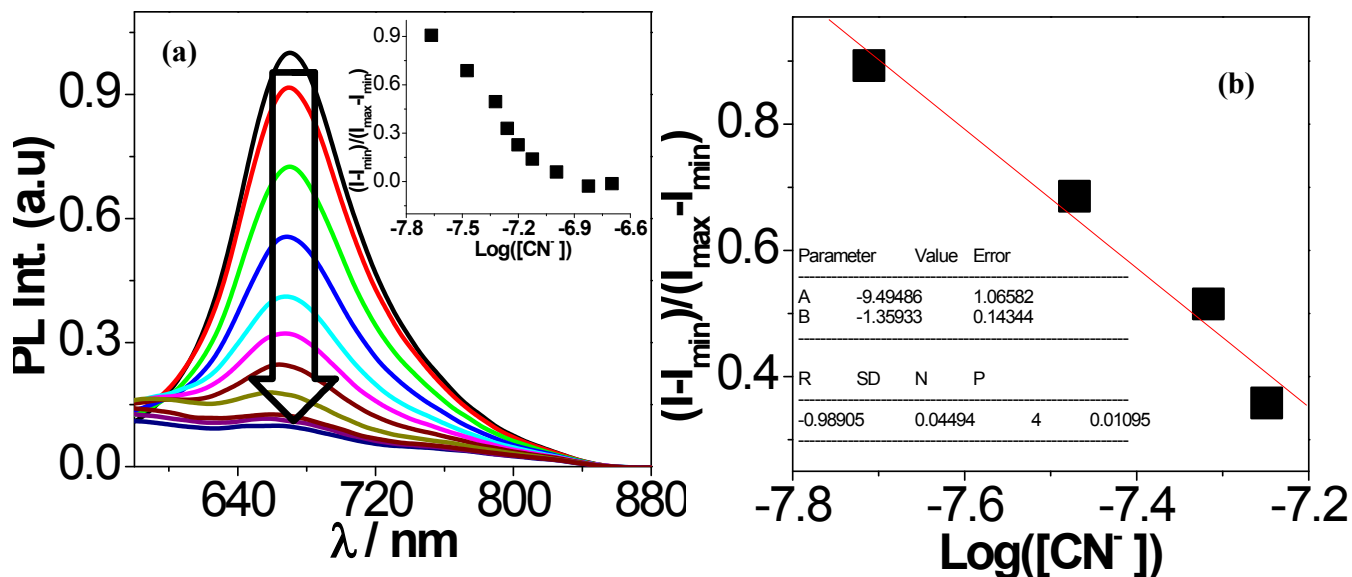

**Fig. S12** (a) **Photoluminescence** changes during the titration of the receptor 1 in DMSO solution, inset: Normalized intensity between the minimum intensity and the maximum intensity. (b) A plot of  $(I-I_{\min})/(I_{\max}-I_{\min})$  vs  $\text{Log}([CN^-])$ , the calculated detection limit of receptor is  $1.72 \times 10^{-8}\text{M}$ .

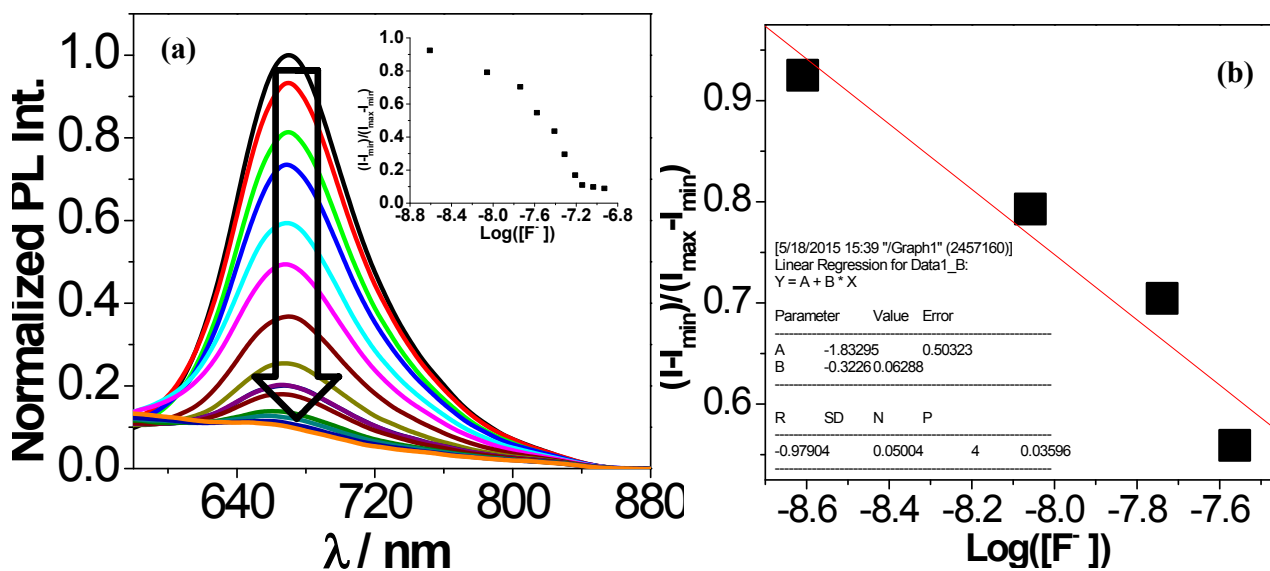

**Fig. S13** (a) **Photoluminescence** changes during the titration of the receptor **2** in DMSO solution, inset: Normalized intensity between the minimum intensity and the maximum intensity. (b) A plot of  $(I-I_{\min})/(I_{\max}-I_{\min})$  vs  $\text{Log}([F^-])$ , the calculated detection limit of receptor is  $1.97 \times 10^{-9}\text{M}$ .

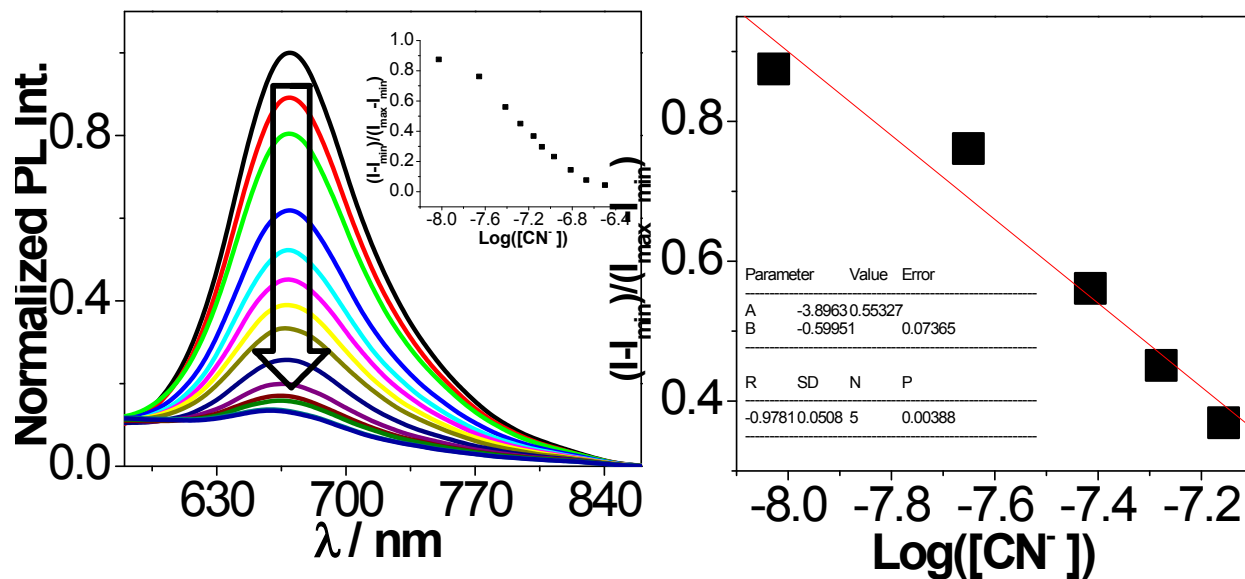

**Fig. S14** (a) **Photoluminescence** changes during the titration of the receptor **2** in DMSO solution, inset: Normalized intensity between the minimum intensity and the maximum intensity. (b) A plot of  $(I-I_{\min})/(I_{\max}-I_{\min})$  vs  $\text{Log}([CN^-])$ , the calculated detection limit of receptor is  $8.51 \times 10^{-9}\text{M}$ .

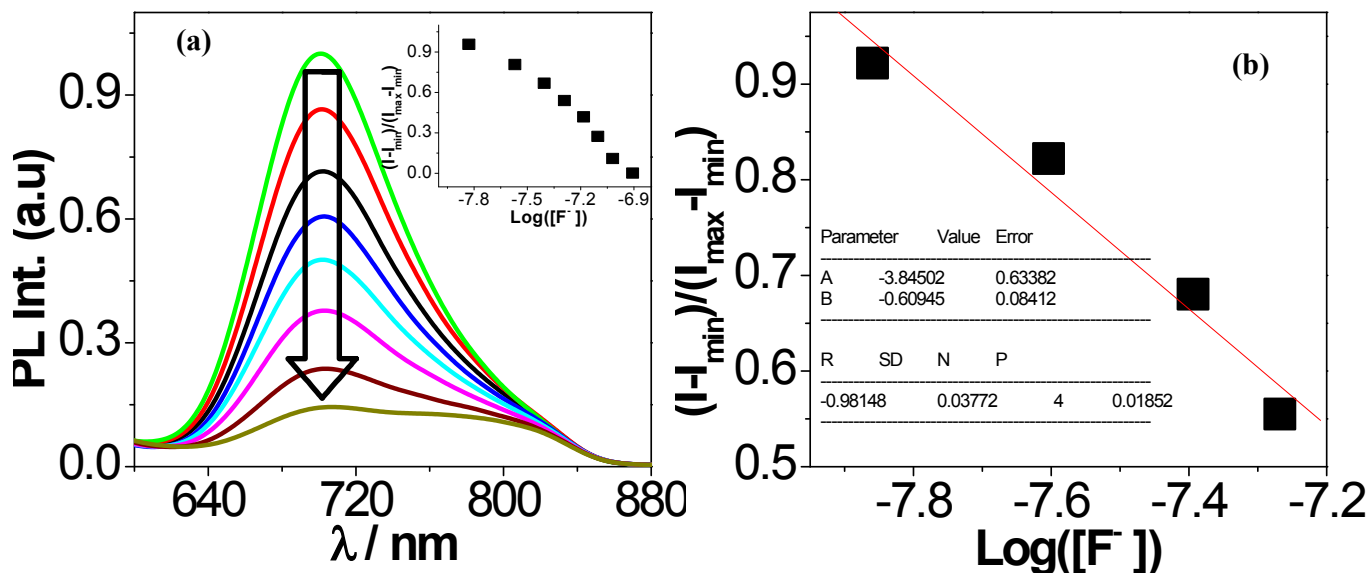

**Fig. S15** (a) Photoluminescence changes during the titration of the receptor **3** in DMSO solution, inset: Normalized intensity between the minimum intensity and the maximum intensity. (b) A plot of  $(I-I_{\min})/(I_{\max}-I_{\min})$  vs  $\text{Log}([F^-])$ , the calculated detection limit of receptor is  $1.23 \times 10^{-8}\text{M}$ .

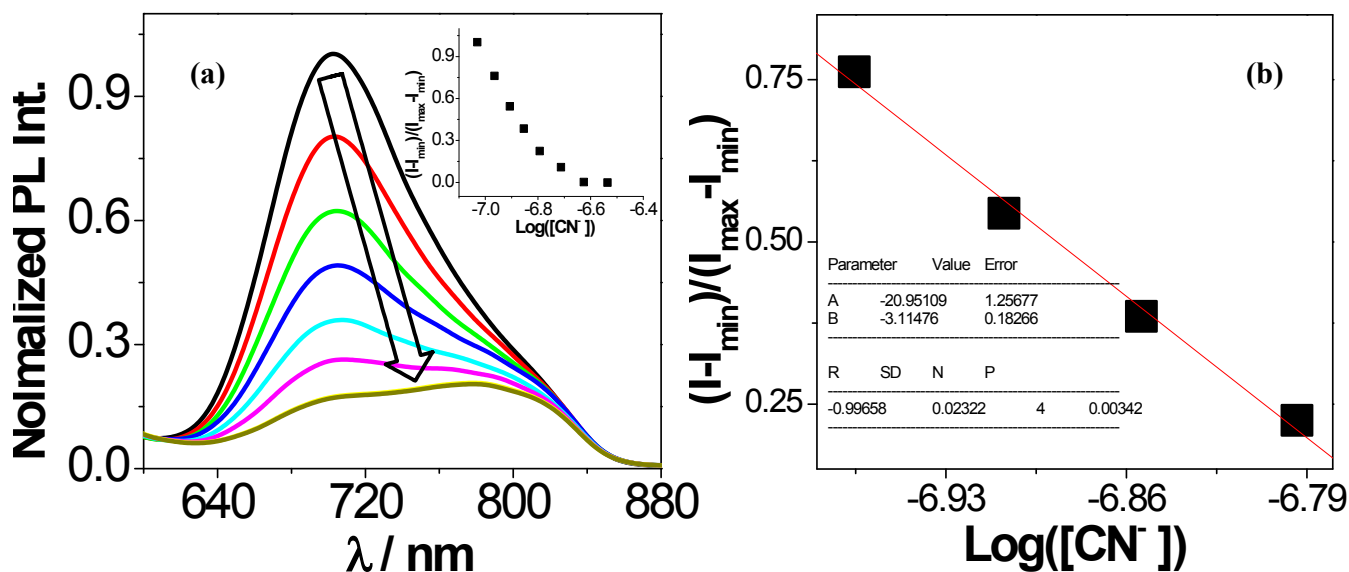

**Fig. S16** (a) Photoluminescence changes during the titration of the receptor **3** in DMSO solution, inset: Normalized intensity between the minimum intensity and the maximum intensity. (b) A plot of  $(I-I_{\min})/(I_{\max}-I_{\min})$  vs  $\text{Log}([CN^-])$ , the calculated detection limit of receptor is  $1.04 \times 10^{-7}\text{M}$ .

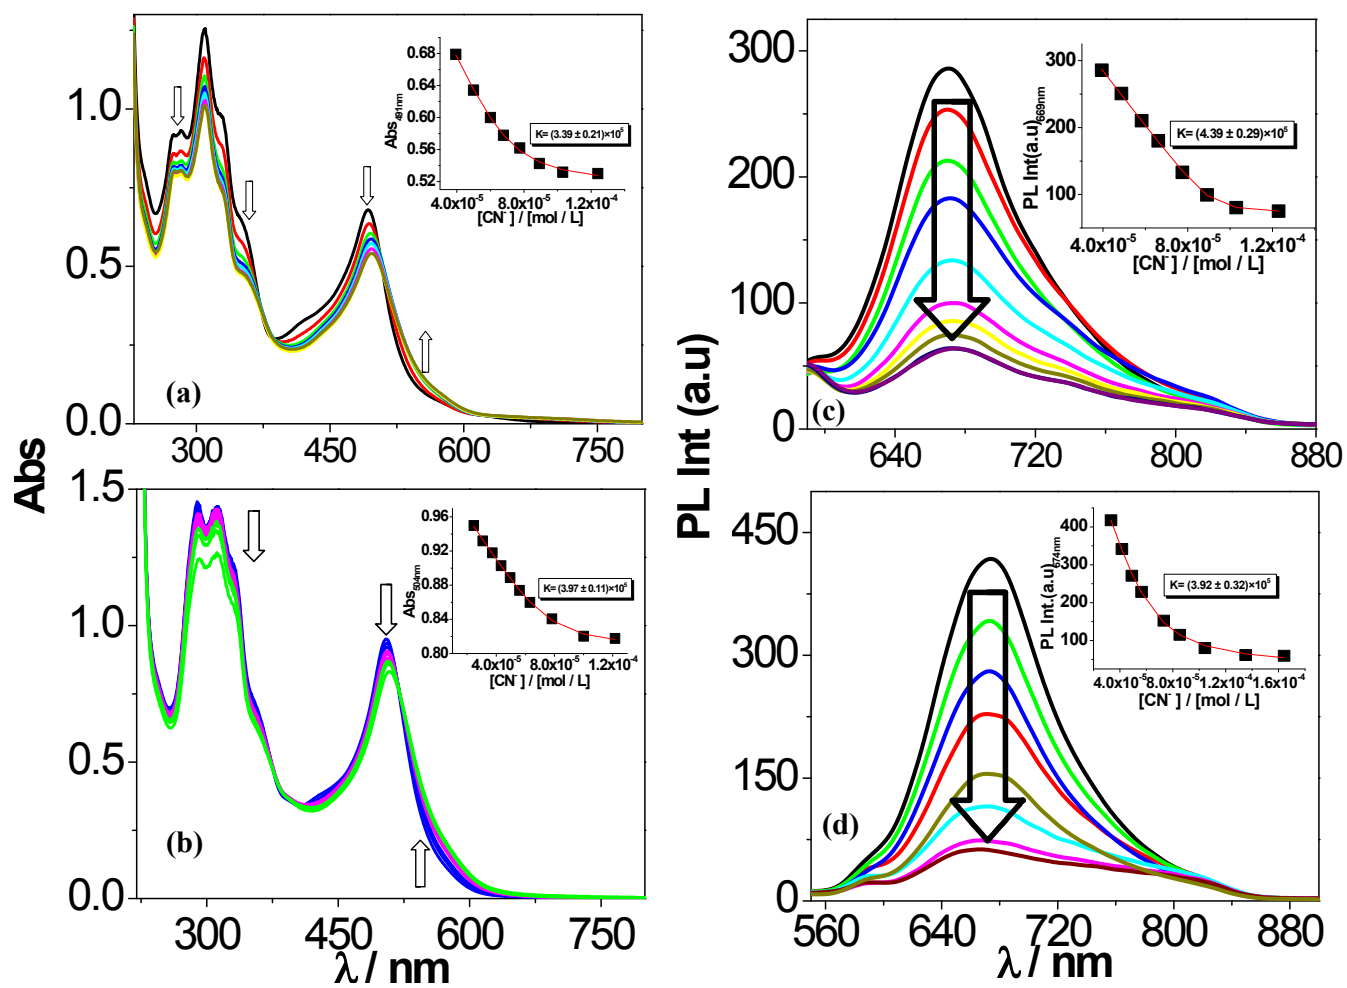

**Fig. S17** Changes in UV-vis absorption (a-b) and steady state luminescence (c-d) spectrum of **1** and **2**, respectively on incremental addition of  $\text{CN}^-$  in DMSO-H<sub>2</sub>O (1:100).

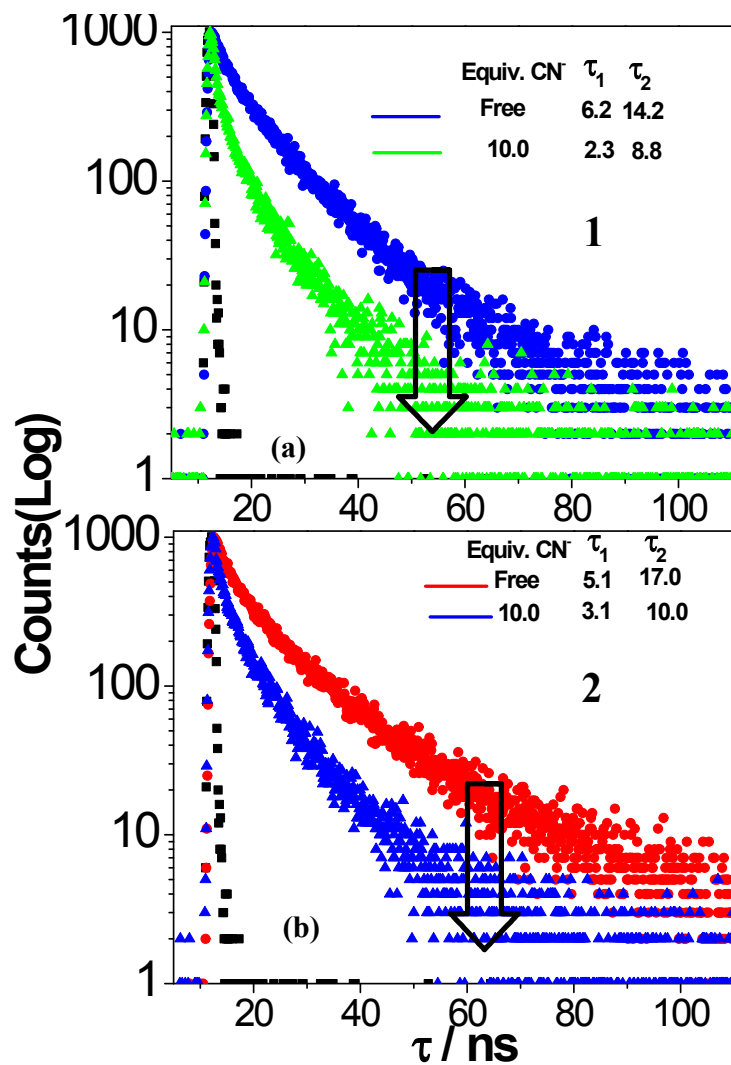

**Fig. 18** Changes in time-resolved luminescence spectra (a and b) of **1** and **2**, respectively in DMSO- $\text{H}_2\text{O}$  (1:100) upon addition of  $\text{CN}^-$  anions as TBA salts.

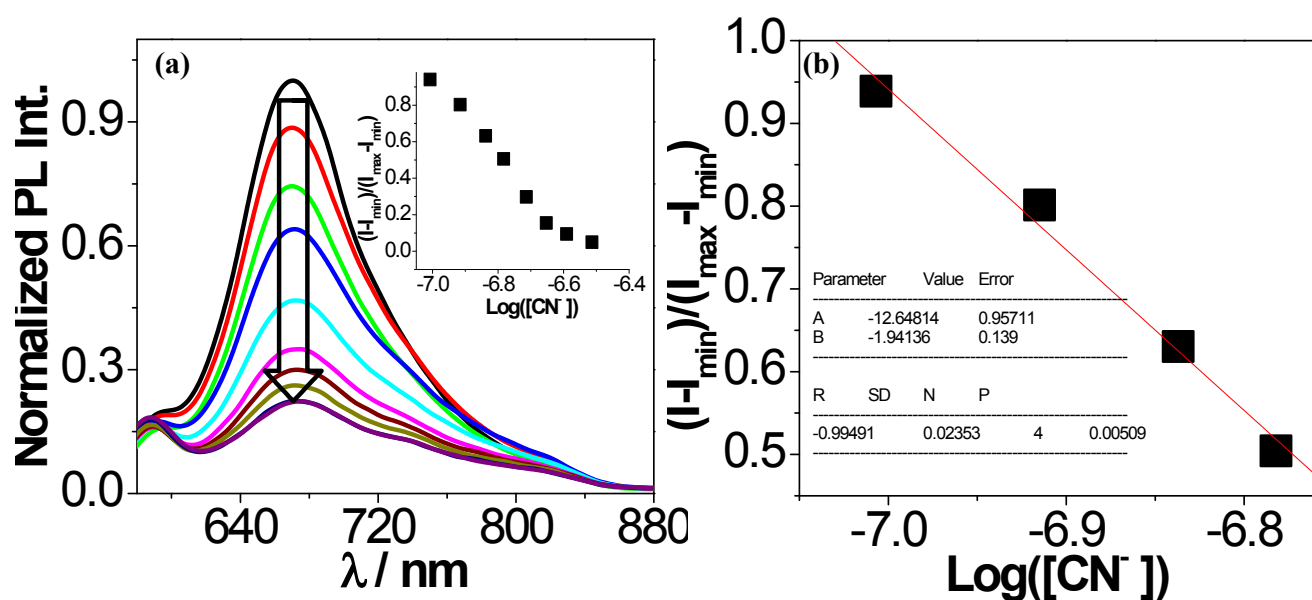

**Fig. S19** (a) **Photoluminescence** changes during the titration of the receptor 1 in DMSO-H<sub>2</sub>O (1:100) solution, inset: Normalized intensity between the minimum intensity and the maximum intensity. (b) A plot of  $(I - I_{\min}) / (I_{\max} - I_{\min})$  vs  $\text{Log}([\text{CN}^-])$ , the calculated detection limit of receptor is  $9.31 \times 10^{-8}$  M.

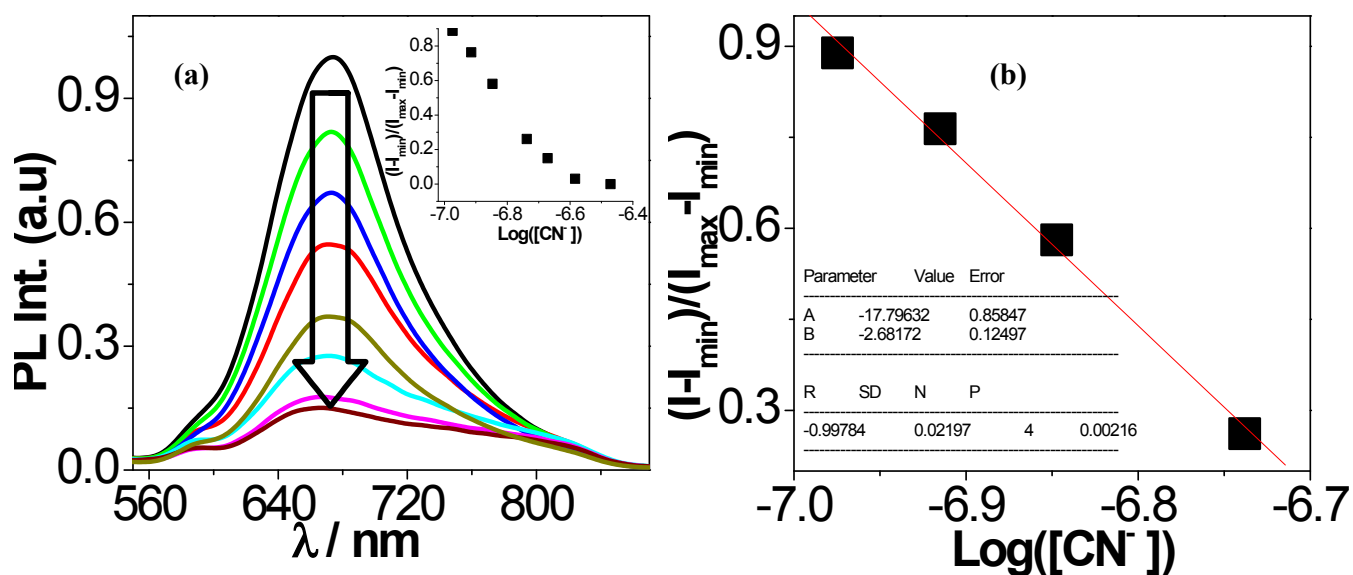

**Fig. S20** (a) **Photoluminescence** changes during the titration of the receptor 2 in DMSO-H<sub>2</sub>O (1:100) solution, inset: Normalized intensity between the minimum intensity and the maximum intensity. (b) A plot of  $(I - I_{\min}) / (I_{\max} - I_{\min})$  vs  $\text{Log}([\text{CN}^-])$ , the calculated detection limit of receptor is  $10.19 \times 10^{-8}$  M.

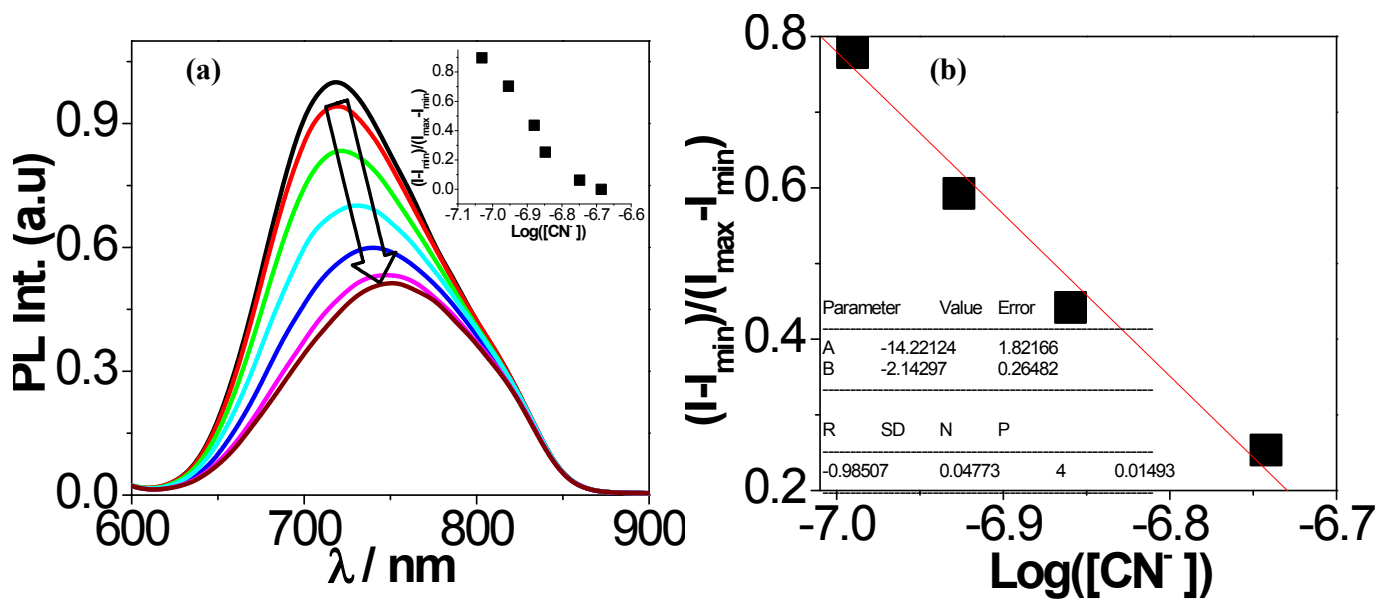

**Fig. S21** (a) **Photoluminescence** changes during the titration of the receptor **3** in DMSO-H<sub>2</sub>O (1:100) solution, inset: Normalized intensity between the minimum intensity and the maximum intensity. (b) A plot of  $(I - I_{\min}) / (I_{\max} - I_{\min})$  vs  $\text{Log}([\text{CN}^-])$ , the calculated detection limit of receptor is  $9.79 \times 10^{-8}$  M.

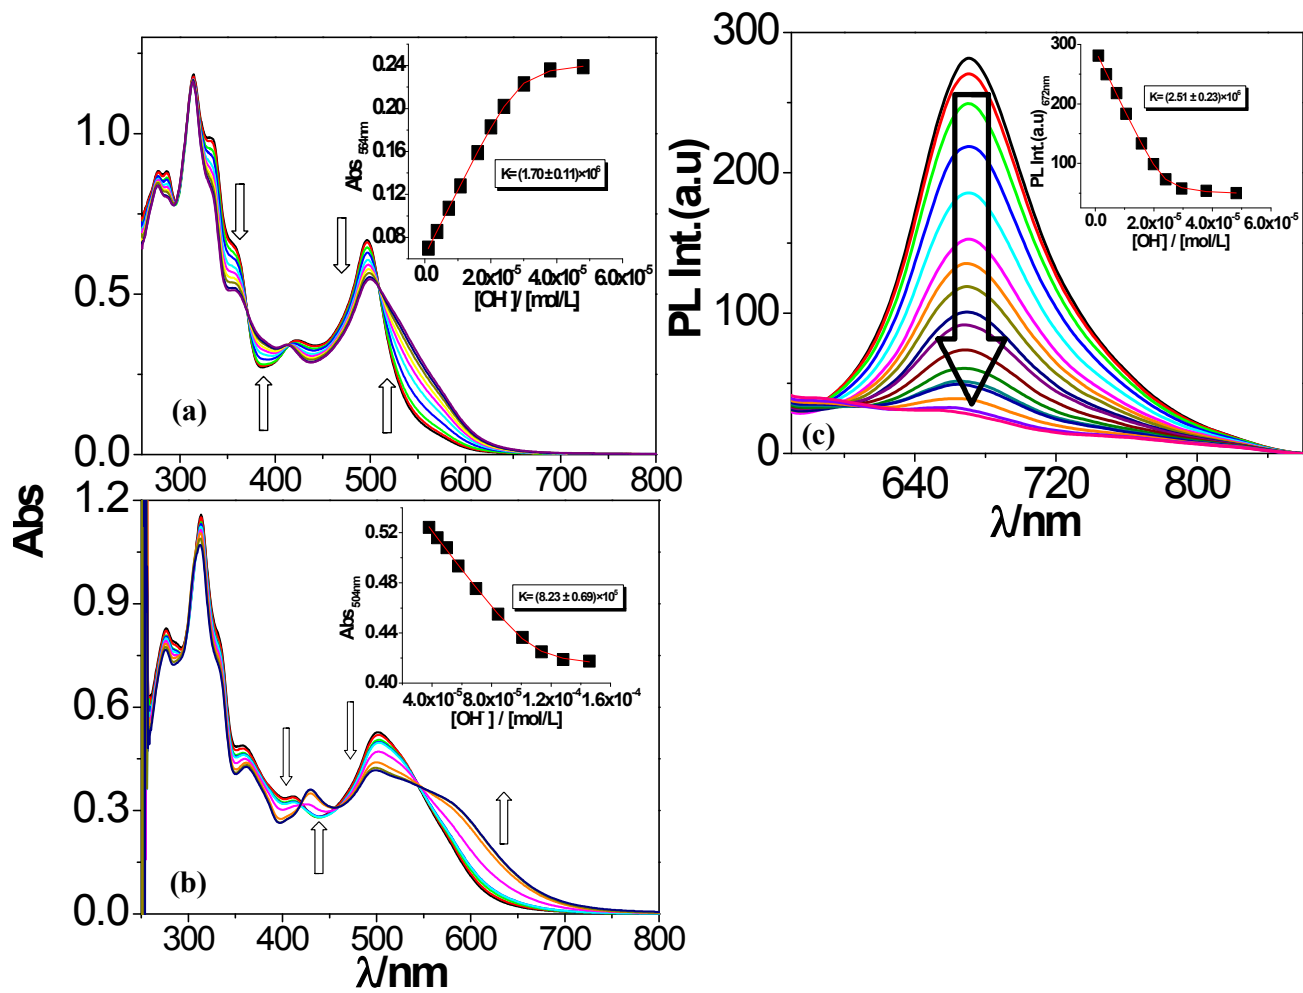

**Fig. S22** Changes in UV-vis absorption (a-b) and steady state luminescence (c) spectrum of **1** on incremental addition of  $\text{OH}^-$  in DMSO.



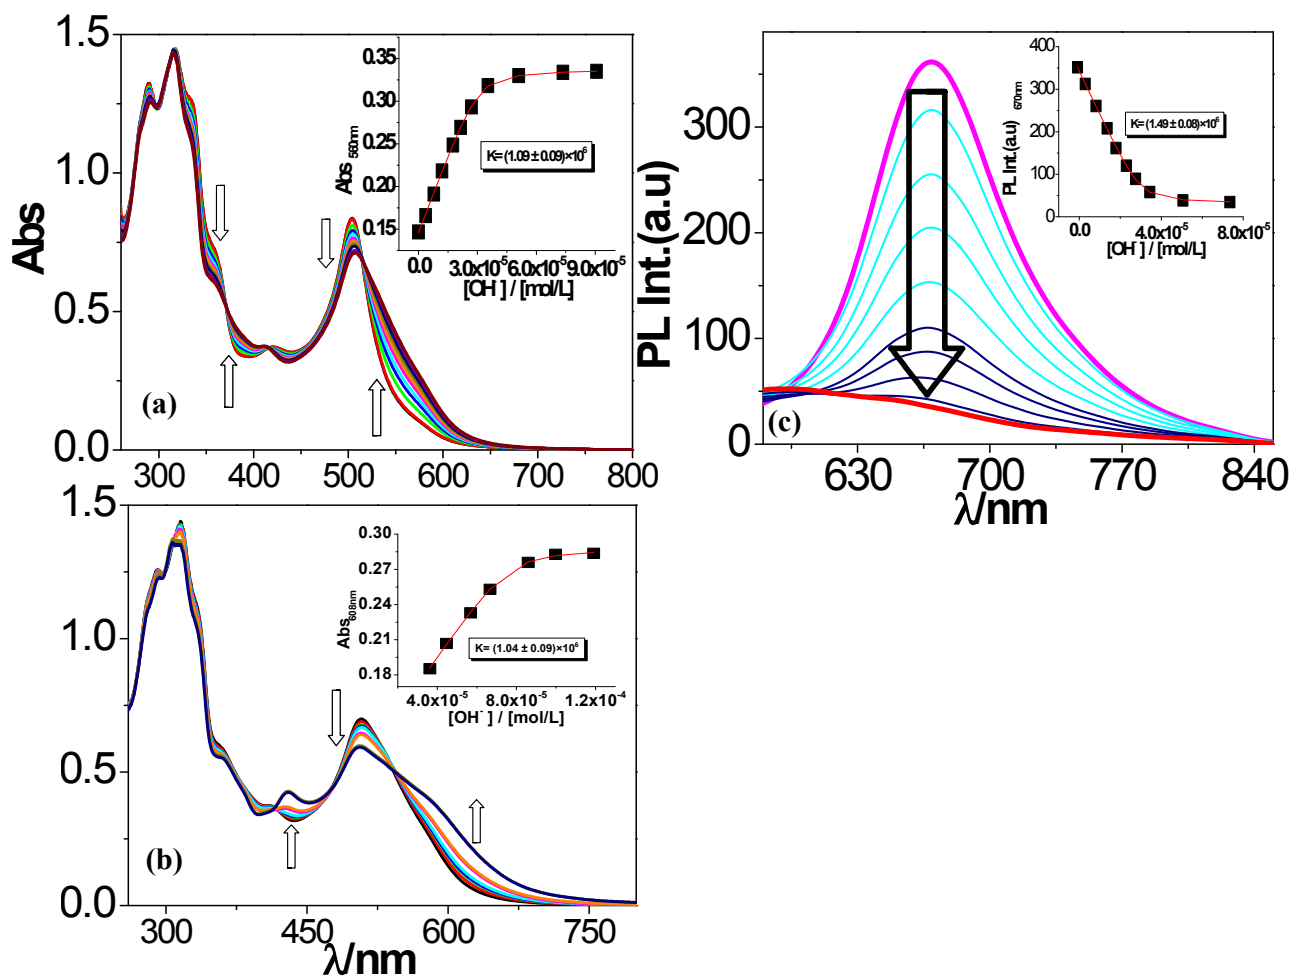

**Fig. S23** Changes in UV-vis absorption (a-b) and steady state luminescence (c) spectrum of **2** on incremental addition of OH<sup>-</sup> in DMSO.

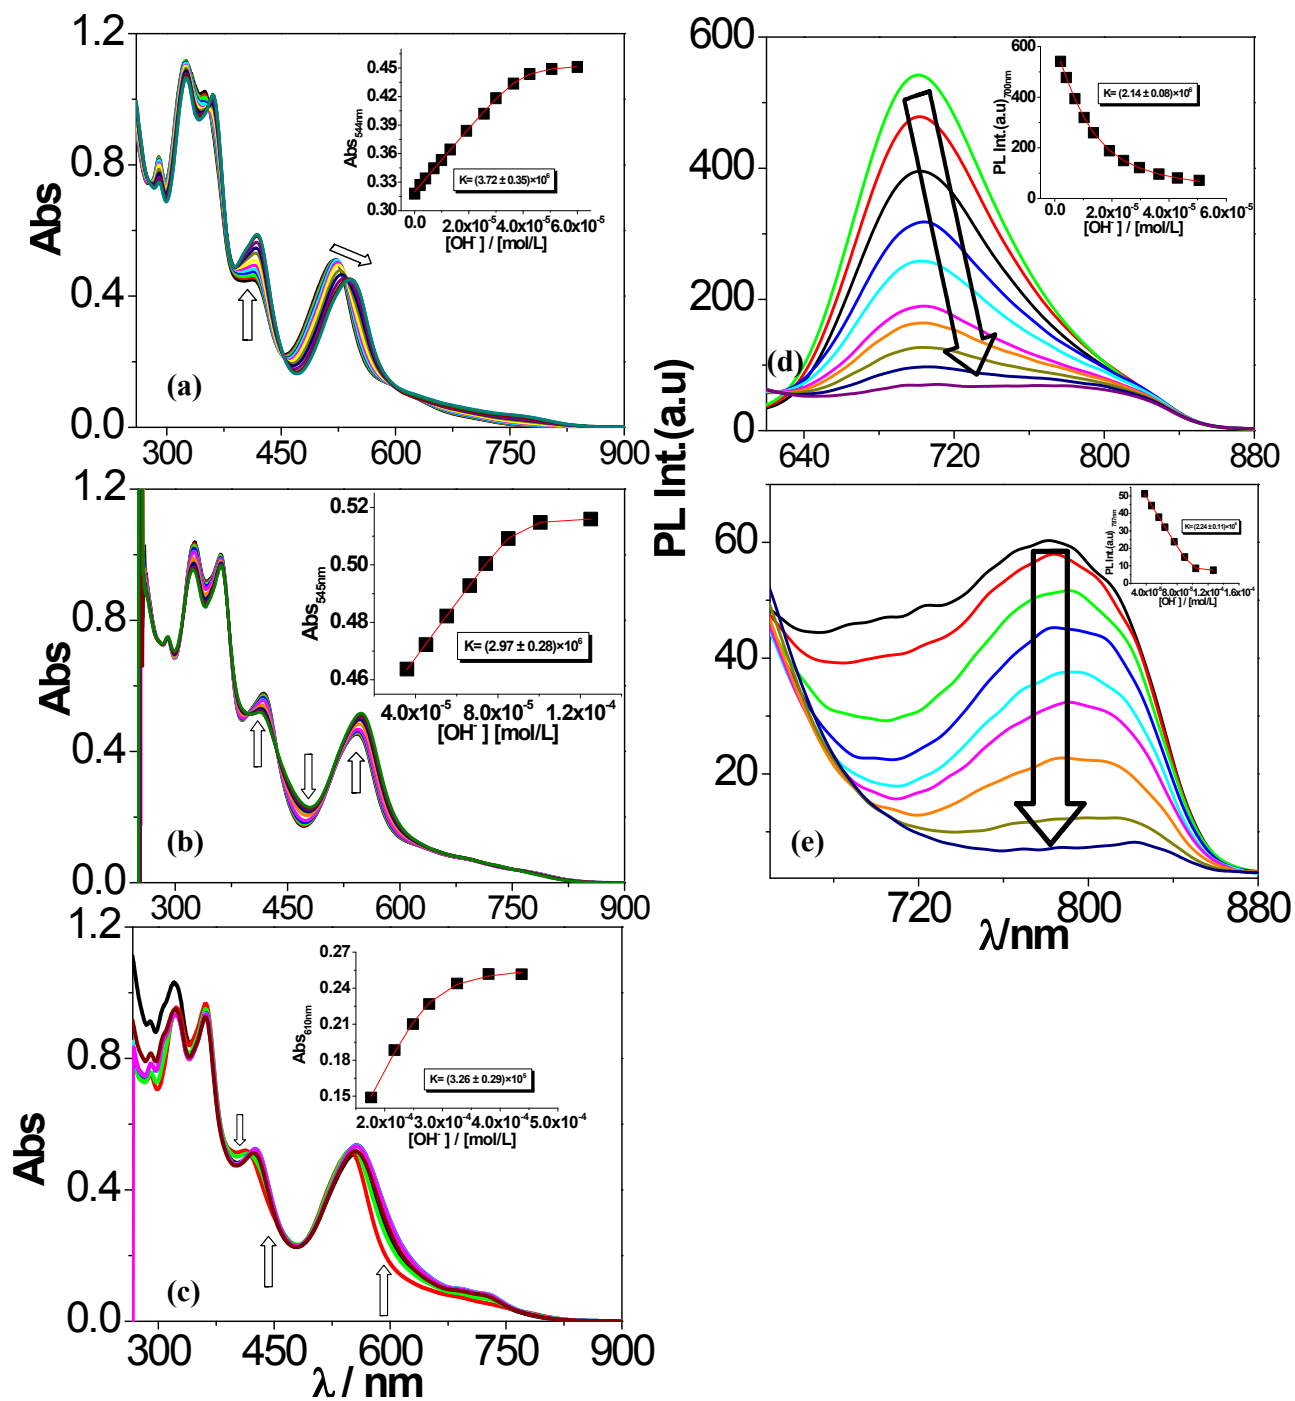

**Fig. S24** Changes in UV-vis absorption (a-c) and steady state luminescence (d-e) spectrum of **3** on incremental addition of  $\text{OH}^-$  in DMSO.

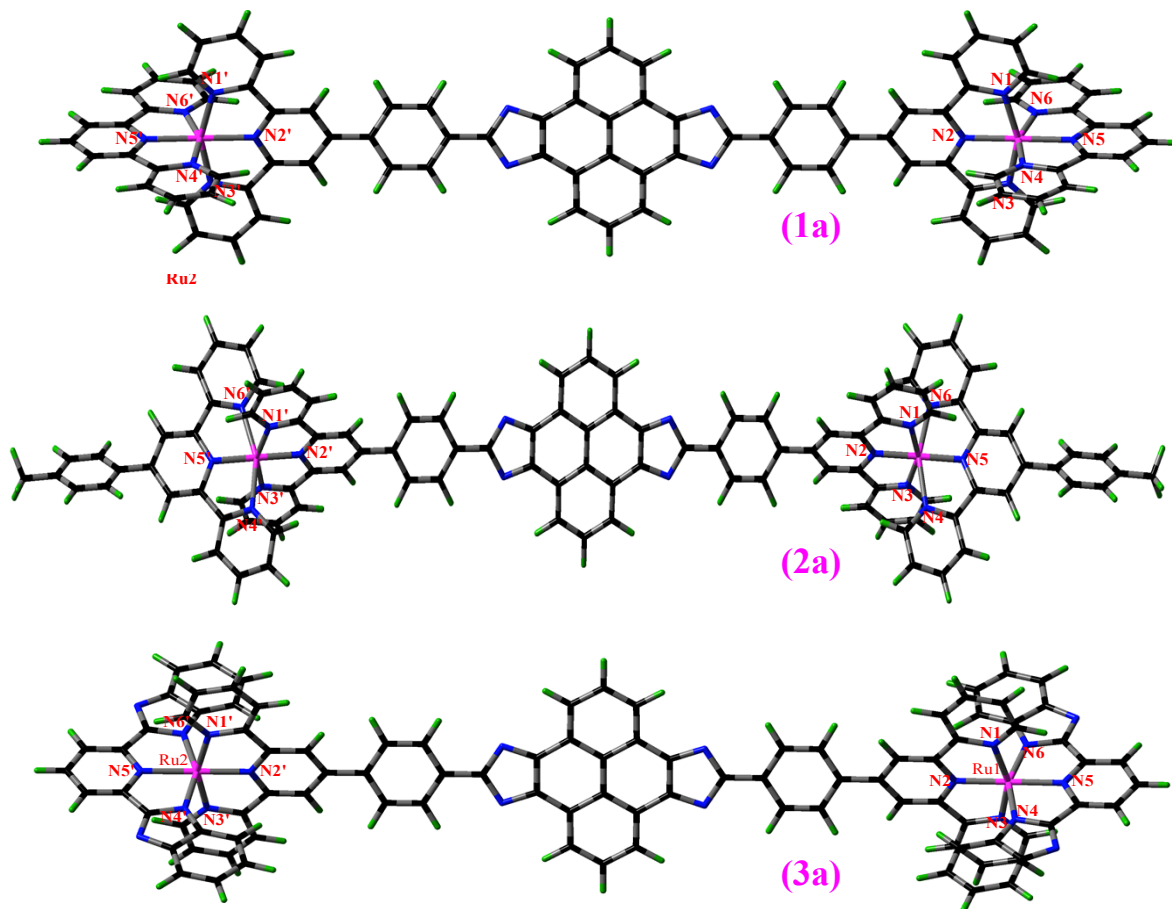

**Fig. S25** Optimized geometries and labeling schemes of  $[(\text{tpy})\text{Ru}(\text{tpy-PhImzPy-tpy})\text{Ru}(\text{tpy})]^{2+}$  (**1a**),  $[(\text{tpy-PhCH}_3)\text{Ru}(\text{tpy-PhImzPy-tpy})\text{Ru}(\text{tpy-PhCH}_3)]^{2+}$  (**2a**) and  $[(\text{pbbzim})\text{Ru}(\text{tpy-PhImzPy-tpy})\text{Ru}(\text{pbbzim})]^{2+}$  (**3a**) in DMSO.

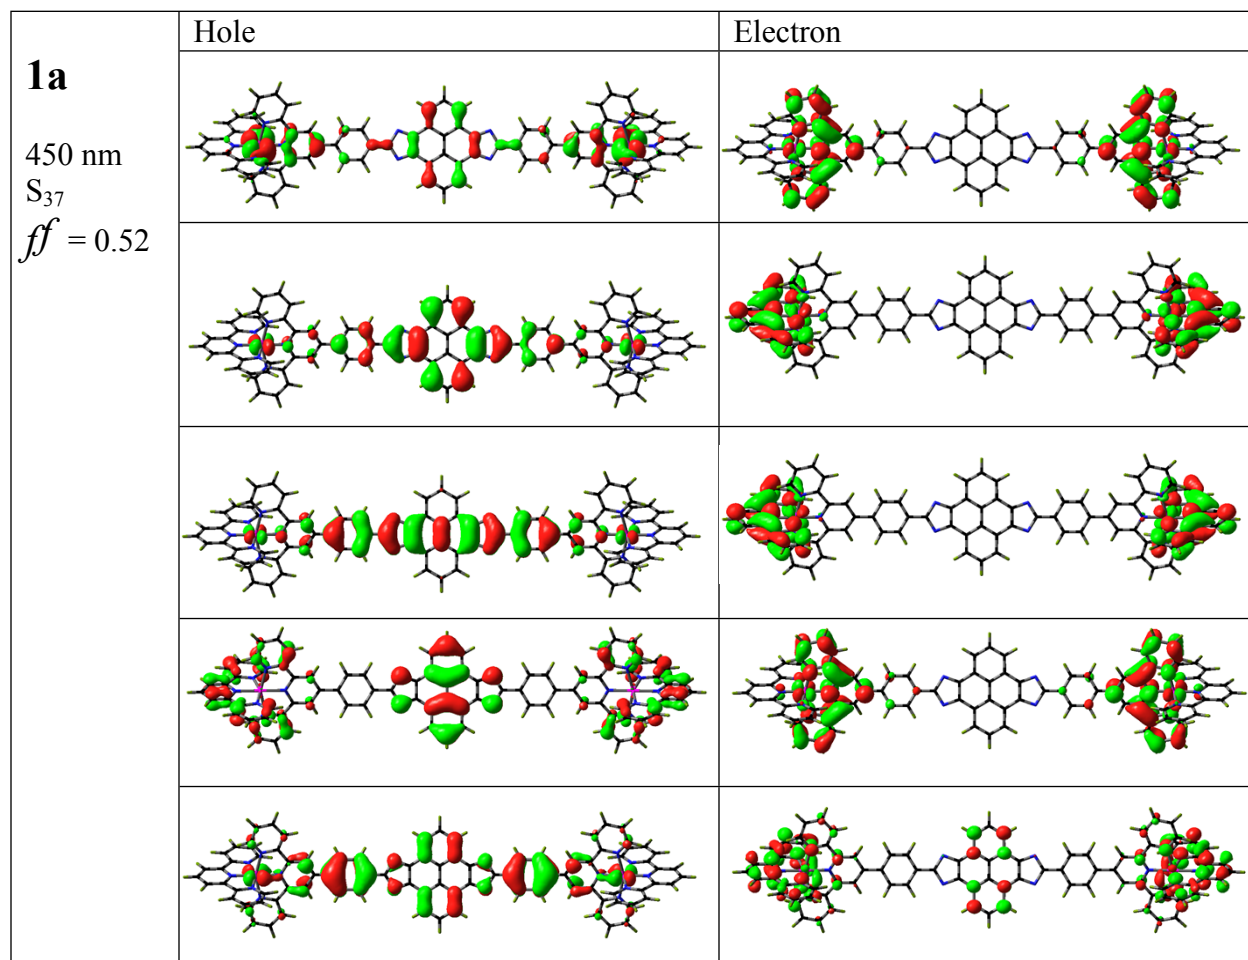

**Fig. S26** NTOs illustrating the nature of optically active singlet excited states in the absorption bands at 450 nm for **1a**. The occupied (holes) and unoccupied (electrons) NTO pairs that contribute more than 10 % to each excited state are only represented.

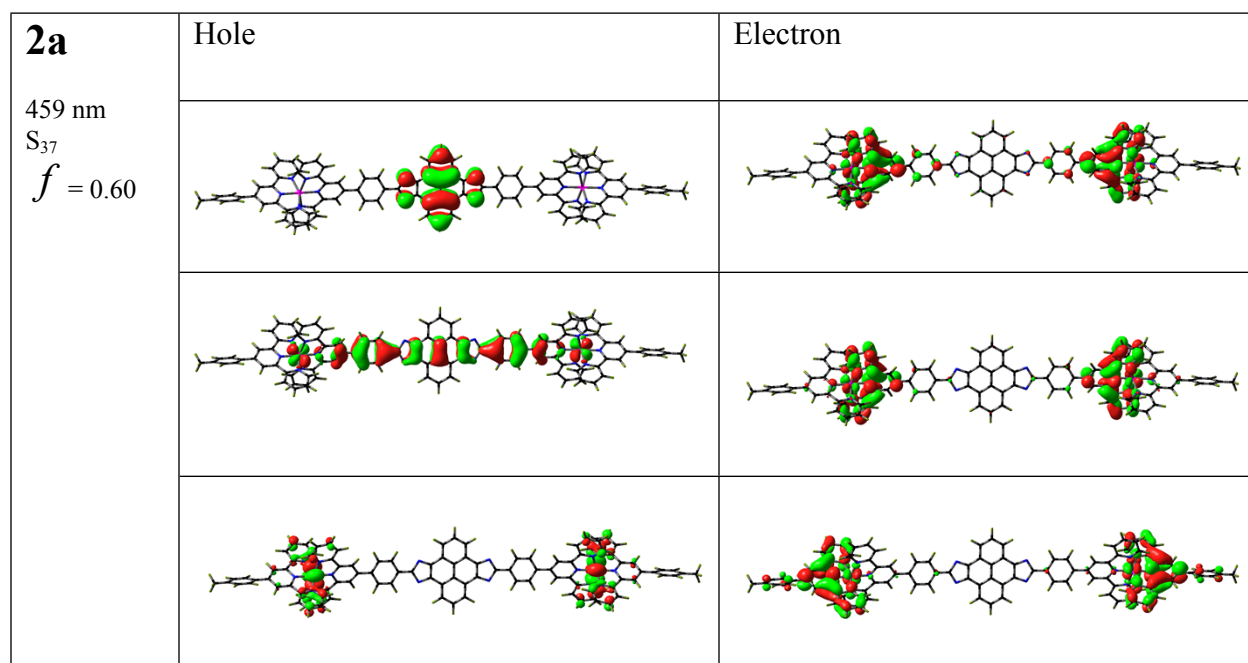

**Fig. S27** NTOs illustrating the nature of optically active singlet excited states in the absorption bands at 459 nm for **2a**. The occupied (holes) and unoccupied (electrons) NTO pairs that contribute more than 10 % to each excited state are only represented.

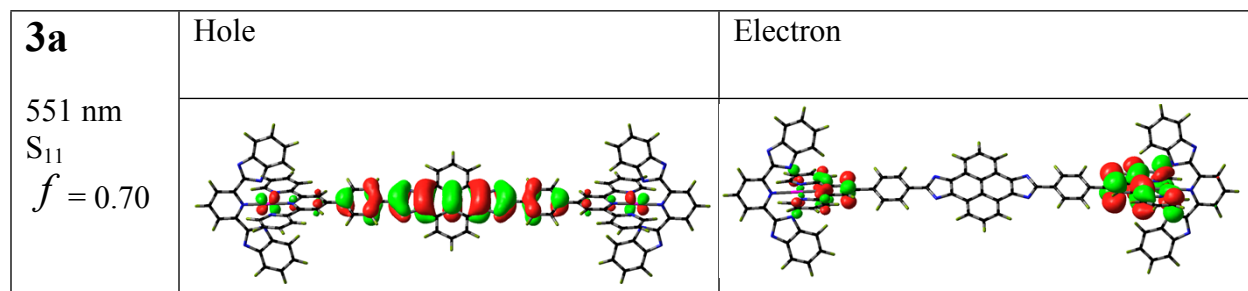

**Fig. S28** NTOs illustrating the nature of optically active singlet excited states in the absorption bands at 551 nm for **3a**. The occupied (holes) and unoccupied (electrons) NTO pairs that contribute more than 10 % to each excited state are only represented.

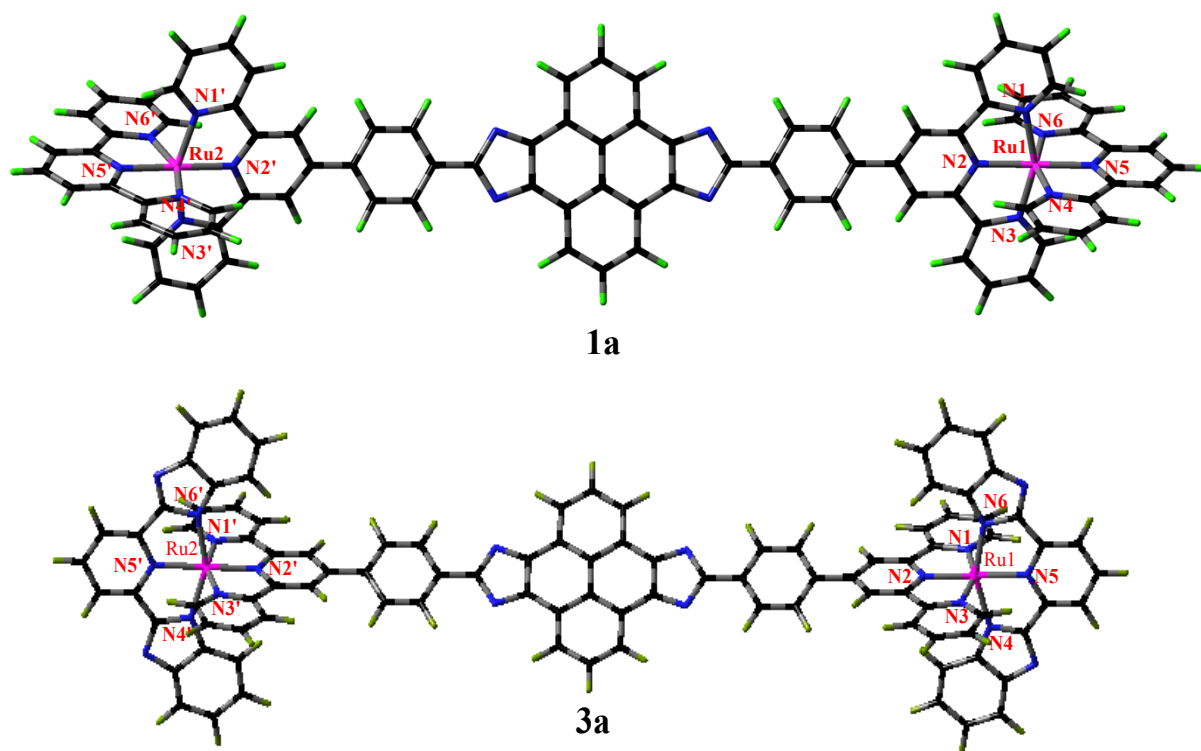

**Fig. S29** UKS Optimized geometries and labeling schemes of  $[(\text{tpy})\text{Ru}(\text{tpy}\text{-PhImzPy}\text{-tpy})\text{Ru}(\text{tpy})]^{2+}$  (**1a**), and  $[(\text{pbbzim})\text{Ru}(\text{tpy}\text{-PhImzPy}\text{-tpy})\text{Ru}(\text{pbbzim})]^{2+}$  (**3a**) in DMSO.

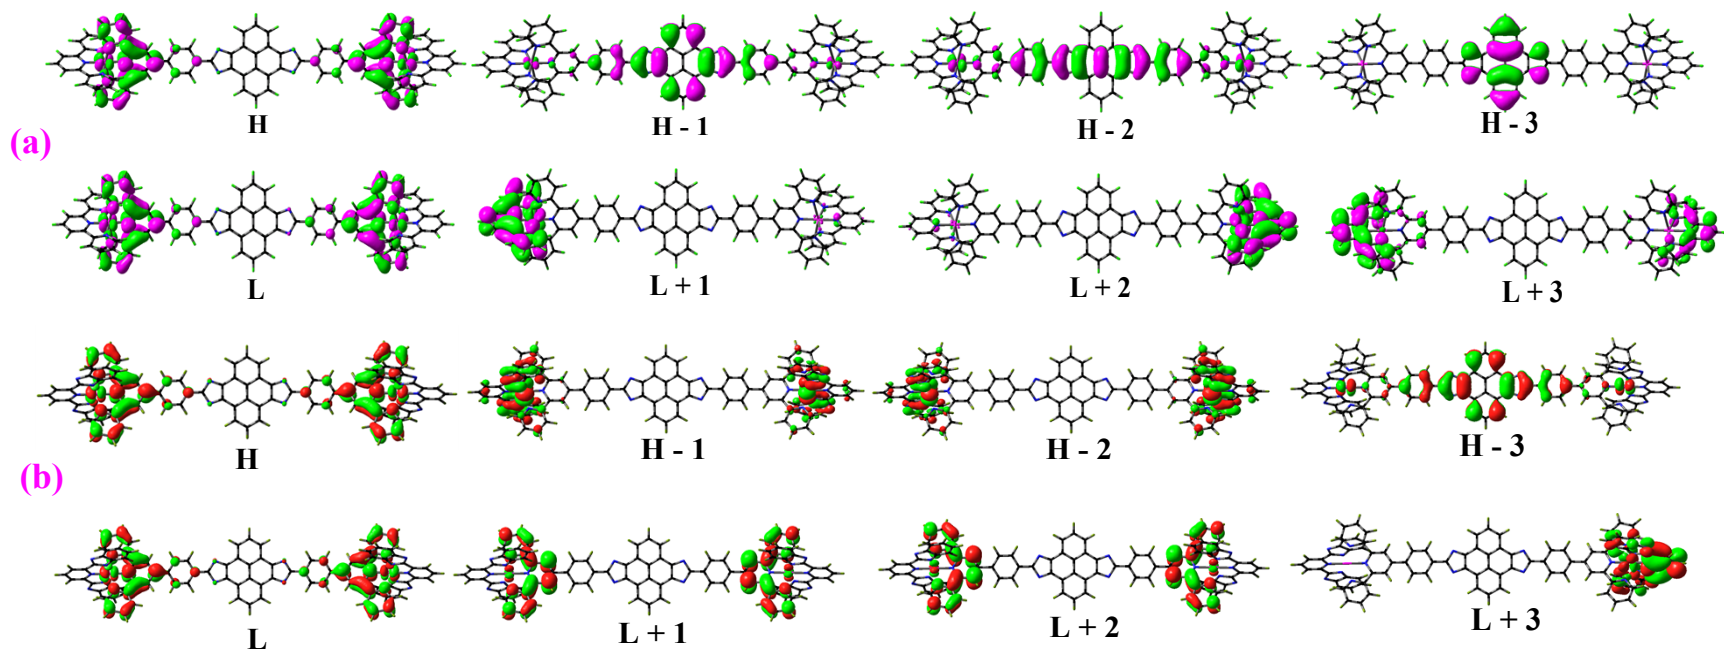

**Fig. S30** Schematic drawings of the selective frontier molecular orbitals for **1a** (a)) and **3a** (b) in UKS optimized state in DMSO.

## References

- S1 M. J. Frisch, G. W. Trucks, H. B. Schlegel, G. E. Scuseria, M. A. Robb, J. R. Cheeseman, G. Scalmani, V. Barone, B. Mennucci, G. A. Petersson, H. Nakatsuji, M. Caricato, X. Li, H. P. Hratchian, A. F. Izmaylov, J. Bloino, G. Zheng, J. L. Sonnenberg, M. Hada, M. Ehara, K. Toyota, R. Fukuda, J. Hasegawa, M. Ishida, T. Nakajima, Y. Honda, O. Kitao, H. Nakai, T. Vreven, J. A. Jr. Montgomery, J. E. Peralta, F. Ogliaro, M. Bearpark, J. J. Heyd, E. Brothers, K. N. Kudin, V. N. Staroverov, R. Kobayashi, J. Normand, K. Raghavachari, A. Rendell, J. C. Burant, S. S. Iyengar, J. Tomasi, M. Cossi, N. Rega, J. M. Millam, M. Klene, J. E. Knox, J. B. Cross, V. Bakken, C. Adamo, J. Jaramillo, R. Gomperts, R. E. Stratmann, O. Yazyev, A. J. Austin, R. Cammi, C. Pomelli, J. W. Ochterski, R. L. Martin, K. Morokuma, V. G. Zakrzewski, G. A. Voth, P. Salvador, J. J. Dannenberg, S. Dapprich, A. D. Daniels, Ö. Farkas, J. B. Foresman, J. V. Ortiz, J. Cioslowski and D. J. Fox, Gaussian 09, revision A.02; Gaussian Inc.: Wallingford, CT, 2009
- S2 Becke, A. D *J. Chem. Phys.* **1993**, *98*, 5648-5652.
- S3 C. T. Lee, W. T. Yang and R. G. Parr, *Phys. Rev. B* 1988, **37**, 785-789.
- S4 P. J. Hay and W. R. Wadt, *J. Chem. Phys.* 1985, **82**, 299-310.
- S5 M. E. Casida, C. Jamorski, K. C. Casida and D. R. Salahub, *J. Chem. Phys.* 1998, **108**, 4439-4449.
- S6 R. E. Stratmann, G. E. Scuseria and M. J. Frisch, *J. Chem. Phys.* 1998, **109**, 8218-8224.
- S7 V. A. Walters, C. M. Hadad, Y. Thiel, S. D. Colson, K. B. Wiberg, P. M. Johnson and J. B. Foresman, *J. Am. Chem. Soc.* 1991, **113**, 4782-4791.
- S8 (a) J. Tomasi, B. Mennucci, R. Cammi, *Chem. Rev.* 2005, **105**, 2999-3094; (b) M. Cossi, G. Scalmani, N. Rega, V. Barone, *J. Chem. Phys.* 2002, **117**, 43-54.
- S9 R. II. Dennington, T. Keith; J. Millam, *Gauss View 3*; Semichem, Inc.: Shawnee Mission, KS, 2007.
- S10 N. M.O Boyle, A. L.Tenderholt, K. M. Langner, *J. Comput. Chem.* 2008, **29**, 839-845.
